# Supplementary material for: Metatranscriptome Analysis of Nasopharyngeal Swabs Demonstrated Unprecedented Species Diversity
Source: Preprints.org preprint supplement (doi:10.20944/preprints202306.0512.v1), 2023-06-07
Supplement: Supplementary file 1 [file supplementary]

## Sheet: species_median_table
Species	Control	Asymtomatic	Mild	Severe	Coefficient
Stenotrophomonas maltophilia	7090.24	21857.3	34484.1	13202.6	0.128813
Veillonella atypica	30.0547	707086	115772	11.4842	0.0822871
Prevotella melaninogenica	29.0782	125852	93428.6	25.7241	0.0265521
Cutibacterium acnes	357.412	1650.31	3367.74	2785.28	0.0225029
Gemella haemolysans	48.6323	89438.2	86254.2	46.8597	0.0223515
Mycobacterium canettii	6188.8	1.88055	1.11362	1.32584	0.0205642
Halomonas sp. JS92-SW72	1570.29	4894.52	7375.46	1778.4	0.0200068
Schaalia odontolytica	40.451	94812.5	48222	35.2173	0.016636
Porphyromonas sp. oral taxon 275	30.4671	36018.3	82505.4	10.1987	0.0166165
Veillonella parvula	31.4545	76491.2	51698.7	22.1903	0.0154186
Pasteurella multocida	795.262	2961.22	6132.2	1462.89	0.0147233
Pseudoprevotella muciniphila	29.0782	52016.3	49834.6	7.75041	0.0128048
Granulicatella adiacens	40.9598	48950	45530.4	19.0497	0.0119636
Megasphaera stantonii	29.981	93805.7	14700.4	3.86954	0.010915
Moraxella osloensis	1255.11	224.363	612.765	797.058	0.0101899
Prevotella jejuni	29.9621	59163.2	26466	6.88613	0.0097049
Lancefieldella parvula	30.2663	69630.6	19596.1	6.84539	0.00954758
Streptococcus mitis	31.1349	40545	32163.6	47.8109	0.00924945
Haemophilus parainfluenzae	32.673	17138.9	44174.5	24.7227	0.00890077
Klebsiella pneumoniae	782.236	1099.84	1409.31	794.65	0.00880775
Rothia mucilaginosa	91.7336	24695.7	29087.6	166.807	0.00841475
Porphyrobacter sp. GA68	39.294	34351.5	22204.3	207.605	0.00830961
Streptococcus parasanguinis	29.981	42180.8	25957.4	5.90561	0.00808932
Prevotella intermedia	29.981	47835.6	22025.9	4.92984	0.0079615
Campylobacter concisus	29.981	9618.69	41508.6	4.02454	0.00763579
Prevotella oris	29.0782	42880.7	20197.5	7.61466	0.00724031
Streptococcus sp. LPB0220	29.0782	36387.3	18770	6.1756	0.00641739
Prevotella histicola	29.0782	51847.4	9159.96	6.16139	0.00626975
Actinomyces pacaensis	29.0782	28841.7	17761.9	3.99235	0.00556144
Gemella sanguinis	29.981	31939.5	14676	5.35628	0.00535934
Prevotella sp. oral taxon 299	31.4545	25765.9	16064	8.25844	0.0050527
Prevotella sp. oral taxon 475	29.0782	24185.8	16247.3	7.12712	0.00492369
Bulleidia sp. zg-1006	29.0782	28620.6	10992	3.78747	0.00445685
Veillonella dispar	29.0782	18866.7	16026.1	3.8871	0.00438602
Streptococcus pneumoniae	32.2771	15436.8	15846.9	34.2481	0.00428444
Clostridium tetani	359.137	1341.47	2060.57	346.786	0.00421148
Neisseria mucosa	29.0782	6241.56	20851.2	8.88026	0.00405983
Prevotella nigrescens	30.2663	29797.2	7496.4	9.85605	0.00405222
Streptococcus oralis	29.0782	20574.5	10596.8	42.2823	0.00395523
Veillonella rodentium	29.0782	16168.9	13147.7	5.04178	0.00369145
Lachnoanaerobaculum umeaense	29.0782	5964.64	18621.9	7.55473	0.00366843
Schaalia meyeri	30.0547	22539.3	9216.32	6.10639	0.00364634
Porphyromonas endodontalis	29.0782	12611.6	13727	4.93288	0.00346346
Leptotrichia sp. oral taxon 212	29.0782	11074.4	14093.7	4.53737	0.00338099
Fusobacterium nucleatum	29.981	26504	4830.65	8.7789	0.00332065
Veillonella nakazawae	29.0782	17581.8	10094.7	2.94758	0.00331448
Streptococcus salivarius	31.1349	24398.7	5695.08	8.91397	0.00327449
Staphylococcus aureus	109.525	1376.37	989.316	329.569	0.00308669
Streptococcus sp. oral taxon 431	29.0782	11542.6	11886.7	5.02277	0.00307356
Prevotella herbatica	29.0782	15215.2	9297.99	4.50665	0.00298576
Veillonella sp. S12025-13	29.0782	15982.7	6969.39	3.70616	0.00267625
Hathewaya histolytica	77.9268	159.122	233.169	315.4	0.00264637
Prevotella veroralis	29.0782	15432.2	6033.44	3.99235	0.00247912
Streptococcus thermophilus	43.693	10543.7	4683.1	84.2182	0.00246622
Gemella morbillorum	29.0782	10986.9	8292.37	5.59521	0.00245272
Nanosynbacter sp. HMT-352	29.0782	19117.4	3393.1	3.99235	0.00238801
Phocaeicola salanitronis	30.2663	8893.87	8772.32	4.89236	0.00234006
Prevotella copri	35.019	7792.08	8640.82	11.404	0.00228396
Granulicatella elegans	29.981	11121.2	6567.5	15.357	0.00226411
Pseudomonas sp. SCB32	259.999	293.774	186.372	172.99	0.00220095
Pseudomonas sp. CIP-10	208.023	145.597	222.705	194.766	0.00218211
Pseudomonas sp. ATCC 13867	251.207	282.945	151.027	170.968	0.00215015
Staphylococcus epidermidis	38.3021	359.813	246.18	254.026	0.00208035
Acinetobacter baumannii	101.344	353.679	435.618	203.57	0.00194579
Lawsonella clevelandensis	74.3288	139.414	515.158	215.468	0.00193764
Tannerella serpentiformis	29.0782	6045.12	7771.31	6.16139	0.0019292
Streptococcus sp. oral taxon 061	29.0782	7990.08	6660.03	5.04178	0.00191798
Streptococcus australis	32.6427	10842.4	4855.57	6.47633	0.00190819
Streptococcus sp. Marseille-Q3533	29.0782	9631.77	5455.92	4.08067	0.00186582
Leptotrichia wadei	29.0782	2994.02	8964.12	8.6471	0.00186412
Lautropia mirabilis	30.0547	909.554	9652.18	14.0045	0.00182971
Pseudomonas sp. PDNC002	209.689	211.428	119.815	144.969	0.00180828
Dialister pneumosintes	36.944	12700.5	2619.83	9.7333	0.00175595
Prevotella enoeca	29.0782	5310.64	6755.48	4.46934	0.00168809
Streptococcus cristatus	33.8308	10223.7	3619.14	10.3555	0.00168741
Prevotella denticola	29.0782	9358.88	3955.43	6.62878	0.00162007
Selenomonas sputigena	29.0782	13722.7	1554.57	5.42645	0.00161939
Neisseria sicca	30.2663	2312.94	7089.01	6.71425	0.00149249
Streptococcus infantis	31.4545	5593.9	5070.91	8.57433	0.00148232
Streptococcus sp. 116-D4	29.981	8261.69	3044.95	19.0234	0.00147053
Clostridium botulinum	80.6944	431.799	407.772	140.753	0.00141453
Fusobacterium pseudoperiodonticum	30.2663	3026.99	6109.2	3.61338	0.00137695
Prevotella buccalis	32.3345	8180.71	2421.27	15.9124	0.00134823
Corynebacterium tuberculostearicum	44.249	30.5628	90.5644	159.636	0.00134651
Candidatus Liberibacter africanus	108.227	220.686	280.91	113.25	0.00126299
Leptotrichia sp. oral taxon 221	29.0782	3289.93	5268.34	3.25623	0.00125946
Bacteroides heparinolyticus	29.0782	5975.24	3768.42	2.93316	0.00125853
Selenomonas sp. oral taxon 478	29.0782	9989.84	1506.83	1.08954	0.00124399
Cutibacterium granulosum	56.4021	88.2255	173.751	133.069	0.00120861
Streptococcus suis	29.0782	8198.43	2105.59	4.72998	0.00120568
Megasphaera massiliensis	29.0782	9544.55	1474.64	1.58002	0.00120243
Pseudomonas aeruginosa	126.068	174.938	115.024	99.3239	0.00118845
Prevotella dentalis	29.0782	5967.3	3045.71	3.99235	0.00115002
Corynebacterium segmentosum	194.636	16.2473	137.274	62.8574	0.00113539
Streptococcus gordonii	31.4545	6153.31	2531.48	8.25844	0.00112396
Capnocytophaga gingivalis	30.2663	1789.3	4956.16	6.09314	0.00109954
Bacteroides caccae	29.0782	4406.58	3577.45	3.29833	0.00108963
Lactobacillus delbrueckii	29.0782	185.919	199.456	126.063	0.00107887
Coprobacter secundus	29.0782	4097.18	3607.6	3.75056	0.00106998
Pseudomonas multiresinivorans	134.415	125.329	69.4723	74.2795	0.00101894
Lactiplantibacillus plantarum	40.1099	188.723	275.322	111.237	0.00101809
Candidatus Saccharimonas aalborgensis	29.0782	5794.96	2273.43	4.57682	0.00101529
Streptococcus sanguinis	34.5616	4198.01	2611.84	13.5852	0.00101078
Candidatus Symbiobacter mobilis	32.6427	10.0131	27.6829	118.097	0.000988404
Paraprevotella xylaniphila	29.0782	2603.6	3706.44	4.57682	0.000957621
Burkholderia multivorans	88.7148	135.59	175.711	82.0122	0.00094235
Parvimonas micra	31.3638	4524.84	1954	13.5373	0.00092393
Lactobacillus iners	38.5835	77.317	86.4544	103.134	0.000912766
Micrococcus luteus	56.3669	38.2996	78.3231	95.7971	0.000912682
Mogibacterium diversum	29.0782	4717.95	2217.22	3.70616	0.000903006
Staphylococcus hominis	33.2695	267.777	224.918	96.4108	0.000884607
Candidatus Hodgkinia cicadicola	61.665	157.171	245.773	79.9907	0.000850692
Streptococcus sp. HSISM1	29.0782	5208.83	1592.26	4.02454	0.000849505
Prevotella ruminicola	29.0782	3737.46	2438.85	3.30301	0.00084732
Phocaeicola dorei	29.981	3741.43	2352.86	3.99235	0.000842022
Finegoldia magna	43.5775	95.4506	145.441	86.2891	0.000815665
Escherichia coli	46.0349	806.418	1079.42	54.8949	0.000804679
Anaerococcus prevotii	63.4802	100.439	79.0549	77.1014	0.000803545
Rothia dentocariosa	37.3953	1626.99	1718.61	34.5073	0.000801044
Corynebacterium kefirresidentii	88.4307	39.1538	266.528	61.4783	0.000795186
Brevibacterium sp. CS2	117.512	31.9413	31.5093	53.4143	0.000793795
Prevotella multiformis	29.0782	2969.23	2458.87	3.04608	0.000779545
Streptococcus pyogenes	29.0782	2425.5	2407.65	5.90561	0.000743637
Streptococcus rubneri	29.0782	3119.65	2095.99	3.51643	0.000738491
Spirosoma pollinicola	81.7527	131.791	141.872	58.1407	0.000736672
Streptococcus lactarius	29.0782	4073.48	1514.99	3.78747	0.000733301
Sphaerotilus sulfidivorans	29.0782	4.12937	31.8074	84.0002	0.000724165
Ottowia oryzae	29.0782	2.29068	17.942	83.5947	0.000718777
Selenomonas sp. oral taxon 136	29.0782	5328.1	799.483	1.56991	0.000715203
Prevotella fusca	29.0782	3744.34	1650.62	2.26097	0.000714102
Streptococcus sp. A12	29.0782	3177.34	1857.02	3.70616	0.000706848
Paracoccus sp. MC1862	106.291	8.05066	16.8075	46.6579	0.000701985
Bacillus amyloliquefaciens	35.2914	919.241	240.274	60.9651	0.000689834
Emergencia timonensis	29.0782	3036.07	1780.6	2.93316	0.000676193
Tannerella forsythia	29.981	3491.41	1457.89	3.70109	0.000674185
Pseudomonas knackmussii	92.5389	77.1453	49.2107	45.3603	0.0006581
Salinivirga cyanobacteriivorans	29.0782	3707.32	1141.67	3.29833	0.000637021
Actinomyces sp. oral taxon 414	30.2663	2386.17	1228.83	16.4638	0.000633628
Prevotella scopos	29.0782	2264.77	1772.86	3.99235	0.000613446
Anaerococcus mediterraneensis	39.7863	233.71	145.944	58.642	0.000610823
Cutibacterium avidum	45.9102	58.2261	111.882	58.3129	0.000607495
Lactobacillus crispatus	33.4193	61.8722	87.3258	63.7349	0.000602567
Aquincola tertiaricarbonis	29.0782	4.25368	15.5907	66.327	0.000590688
Actinomyces trachealis	29.0782	2351.38	1459.82	4.33927	0.000573715
Streptococcus gwangjuense	29.0782	2137.79	1578.93	4.04911	0.000571419
Neisseria subflava	29.0782	685.529	2425.87	2.93316	0.000568087
Inhella inkyongensis	29.0782	1.28407	9.90293	61.8244	0.000556164
Streptococcus pseudopneumoniae	29.0782	1717.06	1658.79	5.25481	0.000555297
Synechococcus sp. PCC 7336	49.931	62.7711	76.5203	50.1658	0.00055526
Prevotella bryantii	29.0782	2655.55	1184.43	3.39023	0.000549973
Streptococcus koreensis	29.0782	2905.76	918.251	3.88087	0.000533515
Selenomonas sp. oral taxon 920	29.0782	3701.81	553.639	2.02008	0.000532971
Campylobacter gracilis	47.3336	1110.33	666.603	21.9392	0.000526187
Haemophilus parahaemolyticus	29.0782	366.293	2267.36	3.70616	0.000519746
Paracoccus contaminans	110.779	3.83435	9.06161	19.7381	0.000515898
Haemophilus haemolyticus	29.0782	392.09	2081.44	5.9226	0.000508731
Streptococcus intermedius	29.0782	2399.14	1027.14	3.99235	0.00050621
Paenibacillus sp. YPD9-1	29.0782	1977.05	1348.73	2.15106	0.000506076
Ideonella dechloratans	29.0782	4.28937	11.1756	54.7421	0.000504184
Odoribacter splanchnicus	29.0782	2350.46	1076.08	2.93316	0.000501818
Prevotella sp. Rep29	29.0782	1905.81	1288.99	3.70616	0.000501629
Proteus mirabilis	61.0538	133.763	64.8537	36.594	0.0004962
Pectinatus frisingensis	29.0782	2901.11	747.169	2.11557	0.000492649
Enterococcus faecium	64.9093	206.395	134.748	31.9322	0.000492193
Pigmentiphaga aceris	31.4545	1.23166	11.238	51.4945	0.000487759
Paracoccus sanguinis	82.7784	12.3449	10.0226	28.0097	0.000485083
Staphylococcus haemolyticus	29.0782	20.5651	16.9403	50.8186	0.000477511
Porphyromonas cangingivalis	29.0782	561.754	1814.58	3.99235	0.000466993
Phocaeicola coprophilus	29.0782	1652.12	1122.39	5.41809	0.000464841
Paracoccus jeotgali	114.146	7.45791	9.22742	11.1383	0.000463739
Schaalia sp. 19OD2882	29.0782	2127.5	905.504	3.95184	0.000462023
Neisseria flavescens	29.0782	514.621	1845.85	2.89991	0.000459667
Corynebacterium matruchotii	40.9598	256.362	493.088	29.8813	0.000459291
Actinomyces faecalis	29.0782	2179.4	793.938	3.70616	0.000447019
Kocuria palustris	47.7377	35.0323	30.9629	36.8816	0.000439805
Leptothrix cholodnii	29.0782	4.09069	9.38268	46.0036	0.000439159
Sulfidibacter corallicola	53.8271	145.024	206.798	28.0453	0.00043261
Prevotella sp. E13-17	29.0782	1708.63	946.462	3.99235	0.000431213
Xanthobacter dioxanivorans	60.9891	59.2174	35.2396	29.2751	0.000430339
[Clostridium] colinum	29.0782	1549.86	1072.89	2.66496	0.000427335
Prevotella sp. E15-22	29.0782	1144.35	1273.15	2.11869	0.000418871
Schlegelella thermodepolymerans	29.0782	1.46923	5.30578	43.047	0.000416373
Streptococcus ilei	29.0782	1825.28	764.574	3.51643	0.000409074
Microbacterium oxydans	29.0782	2062.93	617.758	3.70616	0.000408356
Pseudomonas stutzeri	50.2371	73.5715	53.3807	29.6979	0.000401954
Azorhizobium caulinodans	60.0447	42.6031	18.1232	26.3665	0.000401427
Bacteroides stercoris	29.0782	1871.76	670.17	3.70616	0.000399554
Staphylococcus capitis	32.2771	29.1063	17.9157	38.0234	0.000394294
Butyrivibrio fibrisolvens	29.0782	1417.59	888.027	3.70616	0.000393575
Clostridioides difficile	29.0782	1420.99	640.596	8.90416	0.000392788
Pseudomonas putida	51.4631	53.8048	60.3567	27.81	0.000391382
Streptococcus agalactiae	29.0782	1173.65	969.956	4.43211	0.000390126
Porphyromonas gingivalis	29.981	973.601	769.679	9.55617	0.000381042
Neisseria meningitidis	29.981	530.858	1149.01	6.37637	0.000378376
Bacillus cereus	29.0782	668.02	314.479	22.6826	0.000374951
Actinomyces radicidentis	29.0782	1435.77	756.218	3.70109	0.000374082
Pseudomonas sp. KHPS1	59.8951	33.8614	14.074	22.8629	0.000373548
Bacteroides sp. CBA7301	29.0782	1016.33	1058.74	2.17684	0.000373484
Actinomyces oris	32.6427	418.634	220.538	25.268	0.000368483
Candidatus Sulcia muelleri	33.4193	248.701	140.958	28.66	0.000368172
Bacillus thuringiensis	31.4545	621.038	391.567	18.7484	0.000361815
Corynebacterium ureicelerivorans	43.252	18.086	27.2229	28.5957	0.000361418
Sneathiella sp. PHK-P5	53.0896	32.188	42.9285	23.6622	0.000361332
Corynebacterium sanguinis	32.6427	23.5848	18.0053	32.9378	0.000357361
Corynebacterium lujinxingii	53.8271	6.05935	7.20422	23.6622	0.000355716
Bergeyella cardium	30.2663	656.909	1021.94	3.88192	0.000351851
Haemophilus influenzae	29.0782	250.387	1169.45	6.16139	0.000351836
Cupriavidus pauculus	52.5284	39.1658	27.3014	22.5071	0.000349041
Calothrix sp. NIES-3974	29.0782	2194.92	241.682	2.04586	0.000347754
Brevundimonas sp. PAMC22021	90.4784	1.21512	1.97735	5.88001	0.000344469
Jonesia denitrificans	29.0782	1257.69	658.415	3.86954	0.000343668
Gemella sp. zg-570	29.0782	856.656	790.098	5.42645	0.000340209
Bacillus anthracis	31.5905	981.705	440.055	9.84408	0.000336507
Corynebacterium kroppenstedtii	31.5905	25.71	24.222	29.6774	0.000330905
Mycoplasma mycoides	37.7424	29.156	43.9856	26.2265	0.00032925
Pseudomonas fluorescens	48.5887	44.8	33.0387	21.3964	0.000329154
Rothia aeria	29.0782	231.13	247.229	22.6069	0.000324347
Streptococcus anginosus	30.2663	1079	554.315	4.63989	0.000320596
Neisseria elongata	29.0782	427.03	847.812	6.62878	0.000319718
Megasphaera elsdenii	29.981	1305.76	405.439	5.04178	0.000319194
Leptolyngbya sp. 7M	31.1349	172.801	94.8363	24.8942	0.00031849
Brochothrix thermosphacta	34.5616	1051.53	206.672	10.254	0.000318347
Corynebacterium accolens	56.9287	9.86972	42.6661	16.3482	0.000317864
Xanthobacter sp. YC-JY1	55.4913	22.753	13.4602	17.2283	0.000316093
Streptococcus dysgalactiae	29.0782	968.108	655.176	3.70616	0.000315902
Cardiobacterium hominis	29.981	913.171	543.172	6.38004	0.000315843
Neisseria gonorrhoeae	31.1349	232.308	719.756	9.66571	0.000311044
Megamonas funiformis	29.0782	75.8726	17.2387	27.3562	0.000308762
Lachnospira eligens	29.0782	258.101	1078.87	2.15106	0.000308336
Muriicola soli	44.8449	80.7511	103.015	18.2097	0.000307548
Scytonema sp. HK-05	38.9261	35.5516	41.8814	22.6549	0.000306967
Pseudobutyrivibrio xylanivorans	29.0782	818.809	745.324	2.18308	0.000305621
Streptococcus sp. NPS 308	29.0782	827.575	649.992	3.84931	0.000303496
Moorena producens	42.148	24.6976	31.4111	21.0635	0.00030323
Streptococcus oriscaviae	29.0782	782.467	759.505	1.71666	0.000301168
Paracoccus suum	77.2783	1.86566	0.988676	5.22885	0.000295707
Bacillus velezensis	29.0782	772.702	347.199	10.0022	0.000295685
Corynebacterium coyleae	40.7926	15.1685	31.5093	20.6999	0.000295194
Xanthobacter autotrophicus	49.931	18.2667	15.7055	16.7238	0.000293847
Ligilactobacillus salivarius	43.3361	124.872	70.543	17.1126	0.000293183
Rickettsia endosymbiont of Oedothorax gibbosus	43.6612	28.102	54.6028	18.4793	0.000293133
Roseburia hominis	29.0782	637.147	680.85	3.8871	0.000291591
Salmonella enterica	31.1349	401.323	389.859	11.9411	0.000290308
Kingella oralis	29.0782	439.438	690.903	5.59521	0.000288073
Filifactor alocis	29.981	870.465	336.986	7.39605	0.000286537
Streptococcus vestibularis	30.2663	1101.08	318.916	4.63989	0.000284917
Bacteroides zoogleoformans	29.0782	638.646	639.099	3.70616	0.000283705
Pauljensenia hongkongensis	30.2663	664.171	432.952	7.20992	0.000282912
Schaalia turicensis	29.0782	1276.67	247.088	3.70616	0.00027835
Tepidimonas taiwanensis	33.8308	15.3913	30.6489	21.3665	0.000276893
Faecalibaculum rodentium	29.0782	1149.43	406.568	1.5637	0.00027656
Aggregatibacter aphrophilus	29.0782	620.736	596.3	3.78747	0.000275849
Prevotella sp. E9-3	29.0782	619.805	626.82	2.93316	0.000274322
Spirosoma sp. KUDC1026	29.0782	725.707	571.252	2.82934	0.000274184
Selenomonas ruminantium	30.2663	1071.73	142.765	7.20992	0.000273127
Kinneretia sp. DAIF2	29.0782	3.27242	4.69134	23.6403	0.000272706
Fimbriimonas ginsengisoli	36.5586	69.7451	54.3697	18.0366	0.000269973
Porphyromonas asaccharolytica	29.0782	520.47	460.094	6.90316	0.000268116
Candidatus Portiera aleyrodidarum	41.2937	45.4971	86.5764	15.1115	0.000267007
Campylobacter showae	29.0782	108.61	851.652	3.22829	0.000266517
Schaalia cardiffensis	29.0782	789.528	439.755	3.70616	0.000265376
Anaerobutyricum hallii	29.0782	727.209	473.672	3.70616	0.0002652
Abiotrophia defectiva	29.0782	160.476	483.723	10.2158	0.000264062
Capnocytophaga sputigena	29.0782	398.563	609.852	4.56267	0.000263782
Cutibacterium modestum	33.4193	10.2128	19.8059	19.8618	0.000262181
Chlamydia suis	29.0782	1291.42	249.588	1.14455	0.000261105
Saccharopolyspora pogona	29.0782	930.309	424.142	1.71666	0.000260802
Dolosigranulum pigrum	38.3463	49.3206	24.9004	16.8648	0.00026068
Actinomyces slackii	30.2663	749.579	334.172	5.14846	0.000259519
Corynebacterium macginleyi	46.4839	26.2842	99.0293	11.7111	0.000259325
Olsenella sp. oral taxon 807	29.0782	891.512	294.016	4.71669	0.000258712
Herbinix luporum	29.0782	728.619	466.212	2.81654	0.000257544
Kocuria rhizophila	36.944	16.9845	20.162	17.4975	0.000257042
Candidatus Ichthyocystis hellenicum	36.5586	46.4364	59.4039	16.4529	0.000256953
Corynebacterium jeikeium	31.5905	17.3369	15.1027	19.7518	0.000255181
Bacillus subtilis	29.0782	461.629	289.537	9.51227	0.000254859
Peptoniphilus sp. SAHP1	41.9499	26.4272	18.9394	14.8687	0.000254851
[Haemophilus] ducreyi	31.6433	25.4183	180.953	15.9986	0.000254822
Barnesiella viscericola	29.0782	1044.93	272.229	2.5249	0.000252788
Aquabacterium olei	29.0782	4.70231	6.01761	20.871	0.000252536
Corynebacterium glucuronolyticum	34.6662	33.0328	72.0213	16.568	0.000252334
Mycobacterium tuberculosis	40.9598	65.6001	37.8631	14.0759	0.000252242
Terasakiella sp. SH-1	38.5835	25.2455	44.3012	15.4727	0.000252096
Bradyrhizobium sp. BTAi1	30.2663	1.18974	13.8415	20.0964	0.000251682
Pseudomonas nitroreducens	42.8814	37.7749	13.8411	13.6179	0.000248886
Bacteroides salyersiae	29.0782	529.391	498.046	3.35157	0.000248686
Brevundimonas sp. Bb-A	35.2914	30.6857	39.2067	16.4794	0.000248293
Subtercola sp. PAMC28395	29.0782	962.925	349.002	1.23316	0.000248131
Mycolicibacterium celeriflavum	29.0782	990.775	351.23	0.780321	0.000247638
Pseudomonas citronellolis	42.148	14.8415	8.05476	14.1288	0.000247246
Petrimonas mucosa	29.0782	499.555	518.283	2.93316	0.000246143
Porphyromonas somerae	29.0782	288.684	403.297	7.61003	0.000243422
Lachnoclostridium phytofermentans	29.0782	429.237	528.539	2.5249	0.000238437
Olsenella uli	29.0782	849.542	231.946	3.70616	0.000237522
Eikenella corrodens	29.0782	510.176	460.241	2.88265	0.000237437
Stanieria cyanosphaera	38.5835	20.6936	29.1985	13.8438	0.000237206
Synechococcus sp. PCC 7502	34.5616	24.5455	33.5052	15.4094	0.00023648
Peptacetobacter hiranonis	29.0782	680.048	273.862	4.53737	0.000235145
Peptoniphilus harei	40.2768	25.9722	23.2494	12.7057	0.000233923
Clostridium perfringens	32.6427	204.501	120.352	11.8366	0.000233722
Selenomonas timonae	29.0782	930.435	232.843	2.17684	0.000233613
Butyrivibrio proteoclasticus	29.0782	693.648	402.378	1.34112	0.000233258
Candidatus Minimicrobia vallesae	29.0782	798.343	254.01	3.22829	0.00023291
Gephyromycinifex aptenodytis	37.7424	22.2611	33.2259	13.387	0.000231815
Lactobacillus jensenii	29.0782	226.718	77.9716	13.5758	0.000229981
Selenomonas sp. oral taxon 126	29.0782	898.533	210.431	2.54168	0.00022986
Monoglobus pectinilyticus	29.0782	704.736	300.388	2.93316	0.000229728
Oryzomicrobium terrae	40.7926	20.1765	14.9946	12.1119	0.000229397
Pseudomonas sp. HS-18	40.7926	19.9913	14.6585	12.1119	0.000229326
Streptococcus equi	29.0782	463.153	377.336	3.99235	0.000228162
Campylobacter jejuni	29.0782	100.028	622.811	2.93316	0.000226944
Leptotrichia hofstadii	29.0782	460.682	382.259	3.70616	0.000226608
Actinomyces naeslundii	30.2663	156.989	105.331	12.8155	0.000226404
Pseudanabaena sp. PCC 7367	36.2071	33.5299	42.862	12.9921	0.000226346
Pseudomonas yamanorum	33.8308	10.5467	13.089	14.9409	0.000226058
Lactobacillus helveticus	29.0782	54.3233	53.0861	15.5972	0.00022547
Longicatena caecimuris	29.0782	791.76	226.976	2.82982	0.000225041
Leptotrichia shahii	29.0782	205.806	581.619	2.03674	0.000223225
Kineococcus radiotolerans	49.4005	22.9441	3.35919	7.49098	0.000222148
Corynebacterium genitalium	33.4193	10.6662	17.8253	14.4849	0.000222082
Buchnera aphidicola	30.0547	181.387	112.533	11.8708	0.000222051
Frigoribacterium sp. NBH87	40.9598	11.376	4.02738	11.3712	0.00022192
Leptotrichia hongkongensis	29.0782	435.791	365.639	3.70109	0.000221673
Aggregatibacter sp. 2125159857	29.0782	501.065	388.743	2.35947	0.000221303
Stella humosa	36.5586	28.507	46.0696	12.0378	0.000220508
Xanthomonas campestris	39.7716	6.60704	3.02054	11.7628	0.000220285
Bifidobacterium eulemuris	29.0782	735.89	319.374	0.867184	0.000220266
Pseudomonas chlororaphis	37.3953	16.0324	18.7848	12.1986	0.00021899
Granulicella sp. WH15	29.0782	526.624	235.095	5.04178	0.000218883
Pseudomonas otitidis	41.2937	25.6782	12.134	10.4586	0.000218853
Riemerella anatipestifer	31.4545	193.281	381.78	4.77718	0.000218312
Paracoccus yeei	38.5835	2.38157	2.81481	12.0828	0.000218296
Nocardia cyriacigeorgica	29.0782	845.354	190.861	2.02403	0.000218114
Massilistercora timonensis	29.0782	405.443	346.294	3.8871	0.000217227
Aminipila butyrica	29.0782	673.386	291.686	1.74137	0.00021669
Auritidibacter sp. NML130574	29.0782	437.592	172.792	7.16224	0.000216613
Streptococcus mutans	30.2663	498.293	230.344	4.63989	0.000216545
Corynebacterium sp. NML98-0116	33.4392	178.198	75.6669	10.2803	0.000215326
Corynebacterium xerosis	30.2663	7.01716	11.1408	15.0477	0.000214381
Simiaoa sunii	29.0782	295.747	464.537	2.26097	0.000214239
Streptococcus sp. HSISS2	29.0782	780.375	216.942	1.71666	0.000214167
Mycoplasma sp. (ex Biomphalaria glabrata)	29.0782	362.15	412.278	2.55609	0.000214034
Paenibacillus polymyxa	32.3802	224.634	111.353	9.09595	0.000212923
Pseudomonas resinovorans	39.7716	20.1929	8.37629	10.4586	0.000212704
Bifidobacterium longum	29.981	165.653	64.9443	11.7949	0.000212215
Enterococcus cecorum	29.0782	55.0887	38.3967	14.1115	0.000212185
Pseudomonas lalkuanensis	38.5835	17.7386	6.04107	10.9381	0.000211715
Thermotoga maritima	36.2071	5.35974	10.0685	11.9905	0.000211148
Acetilactobacillus jinshanensis	29.0782	594.502	207.133	3.70616	0.00021062
Corynebacterium urealyticum	30.2663	5.88043	6.06698	14.6392	0.000210442
Limosilactobacillus fermentum	30.2663	421.649	111.806	7.0188	0.000208305
Phocaeicola vulgatus	29.0782	225.535	295.006	5.87526	0.000207569
Cloacibacterium caeni	35.019	17.0266	16.9785	11.6768	0.000207033
Friedmanniella luteola	30.2663	33.7422	24.7155	13.4302	0.000206976
Qiania dongpingensis	29.0782	204.604	437.367	2.93316	0.000206675
Streptococcus uberis	29.0782	427.333	354.86	1.91437	0.000205955
Anthocerotibacter panamensis	29.0782	605.46	216.52	2.70545	0.000205696
Aquabacter sp. L1I39	38.9261	19.5624	12.5644	9.80185	0.000205645
Enterobacter kobei	36.2071	12.6855	17.3014	10.929	0.000205103
Bacillus altitudinis	29.0782	409.002	196.508	5.43424	0.000205039
Pseudomonas alcaligenes	38.5835	13.9083	8.10239	9.97213	0.000204546
Hymenobacter sp. PAMC 26554	35.019	94.2931	9.00266	10.5693	0.000204503
Epilithonimonas vandammei	32.2771	17.4303	13.1111	12.5613	0.000203896
Haematobacter massiliensis	36.2071	6.23076	9.62208	10.929	0.000203293
Peptoniphilus ivorii	29.981	78.1883	48.3205	11.9796	0.000203059
Lactococcus cremoris	32.6427	139.23	116.34	8.38638	0.000201658
Paracoccus sp. AK26	36.2071	1.8584	1.61488	10.929	0.000201619
Candidatus Gromoviella agglomerans	35.019	24.4082	25.6967	10.5693	0.00020089
Gottschalkia acidurici	29.0782	378.051	269.418	3.66418	0.000200812
Morganella morganii	29.981	140.621	177.213	8.01722	0.000199949
Candidatus Chromulinivorax destructor	35.7038	47.3911	26.1759	9.77289	0.000199409
Staphylococcus lugdunensis	30.2663	72.6233	49.8743	11.3264	0.000198917
Anaerostipes hadrus	29.0782	165.33	334.148	4.56267	0.000198697
Neisseria sp. oral taxon 014	29.0782	310.489	405.362	1.25786	0.000198667
Treponema vincentii	29.0782	414.668	285.163	2.56962	0.000198518
Oscillatoria acuminata	31.4545	182.788	100.81	8.25844	0.000198196
Treponema brennaborense	29.0782	179.205	480.59	1.14455	0.00019806
Marivirga tractuosa	29.0782	80.8368	441.578	3.11219	0.000197546
Parabacteroides goldsteinii	29.0782	365.204	302.535	2.65459	0.000197479
Dorea longicatena	29.981	172.792	329.497	3.99235	0.000197398
Cupriavidus metallidurans	35.019	21.2633	13.9957	10.3821	0.000197348
Neisseria lactamica	30.2663	146.627	348.741	3.70899	0.000196974
Suicoccus acidiformans	29.0782	23.0448	11.238	13.028	0.000196933
Listeria monocytogenes	30.2663	261.401	150.184	6.52109	0.000196351
Ancylobacter sp. TS-1	37.3953	14.0546	5.76714	9.41917	0.000196144
Leadbetterella byssophila	29.0782	389.62	248.174	3.30301	0.000195779
Corynebacterium atypicum	35.019	20.8257	31.3697	9.78472	0.000195664
[Ruminococcus] torques	29.0782	221.844	317.513	3.82473	0.000195651
Anaerolinea thermophila	32.6427	409.617	94.2332	4.74682	0.000195477
Ralstonia solanacearum	33.8308	62.7151	39.547	9.51857	0.000194822
Rhizobium oryzihabitans	37.3953	6.71686	4.89462	9.30371	0.000194489
Streptococcus iniae	29.0782	516.576	190.138	2.82982	0.000194403
Leptotrichia trevisanii	29.0782	265.576	289.932	3.70616	0.000194292
Clostridium sp. SY8519	29.0782	689.522	102.61	2.58805	0.000194159
Campylobacter rectus	29.0782	65.4114	435.729	2.93316	0.000193897
Pseudoleptotrichia goodfellowii	29.0782	247.408	395.498	1.53899	0.000193499
Phytobacter ursingii	37.3953	13.3369	5.02568	9.04601	0.000193197
Streptococcus troglodytae	29.0782	617.699	176.973	1.71666	0.000193145
Actinomyces howellii	30.2663	364.551	150.123	4.79413	0.000192826
Ramlibacter tataouinensis	30.2663	12.7193	10.8754	12.0621	0.000192739
Sodaliphilus pleomorphus	29.0782	284.733	303.352	2.93316	0.000192437
Tepidibacter sp. 8C15b	29.0782	363.973	217.013	3.70616	0.000191472
Gemmatirosa kalamazoonesis	30.2663	78.2733	32.2191	10.6271	0.00019142
Methylobacterium durans	37.3953	9.56204	3.41752	8.87746	0.000191352
Streptococcus sp. FDAARGOS_522	29.0782	363.059	268.787	2.56962	0.000191257
Blautia massiliensis	29.0782	297.363	264.269	3.46337	0.000191246
Candidatus Sodalis pierantonius	29.981	53.3392	246.18	6.38004	0.00019101
Treponema parvum	29.0782	134.935	434.743	1.71196	0.000190946
Hymenobacter monticola	35.019	78.1342	21.2749	8.64764	0.000190781
Pseudomonas mendocina	39.7716	17.7915	6.71838	7.47804	0.000190148
Shinella sp. XGS7	29.0782	2.71984	9.62208	12.3372	0.000189731
Streptococcus sobrinus	29.0782	354.828	204.949	3.82473	0.000189598
Capnocytophaga haemolytica	29.0782	271.145	293.003	2.93316	0.000189559
Dermacoccus sp. PAMC28757	32.6427	4.02964	8.74734	10.6943	0.000189379
Mobiluncus curtisii	34.5616	111.161	29.9891	7.97455	0.00018864
Priestia megaterium	29.0782	165.571	81.9042	8.61197	0.000188349
Emticicia sp. 21SJ11W-3	29.0782	306.912	228.668	3.70616	0.000188207
Apibacter raozihei	29.0782	480.583	245.862	1.21149	0.000188097
Enterococcus faecalis	29.981	199.296	130.931	6.62878	0.000187536
Rothia amarae	33.9822	29.1845	17.8253	9.30697	0.000187267
Aggregatibacter actinomycetemcomitans	29.0782	204.087	353.835	2.11557	0.000187208
Spirosoma montaniterrae	29.0782	611.035	173.751	1.04448	0.000187052
Wansuia hejianensis	29.0782	460.527	156.396	3.22829	0.000186916
Streptococcus sp. FDAARGOS_192	29.0782	642.128	101.642	2.18308	0.000186743
Leptotrichia buccalis	29.0782	103.962	301.546	4.39499	0.000186721
Cupriavidus taiwanensis	36.2071	9.39693	8.88184	8.64682	0.000186557
Denitratisoma sp. DHT3	36.2071	11.0237	7.50615	8.64682	0.000186483
Corynebacterium imitans	31.1349	4.47086	7.9094	10.8892	0.00018572
Ensifer adhaerens	37.3953	4.55416	3.80239	8.15141	0.000185586
Neisseria macacae	29.0782	113.084	317.365	3.70616	0.00018497
Campylobacter ureolyticus	33.6647	52.523	228.143	4.30073	0.000184885
Pseudomonas oryzihabitans	33.8308	14.4943	12.8949	9.24578	0.000184201
Actinomyces sp. HMT 175	30.2663	172.507	90.4333	7.20992	0.000183899
Chryseolinea soli	36.2071	89.2854	47.0191	6.45657	0.000183621
Rhodospirillum rubrum	29.0782	580.816	101.333	2.44	0.000183083
Burkholderia pseudomallei	30.2663	152.651	111.966	6.80529	0.000182562
Candidatus Nanosynbacter sp. HMT352	29.0782	638.596	177.762	0	0.000182436
Starkeya novella	36.2071	11.998	4.61371	8.10026	0.00018206
Aminipila terrae	29.0782	362.424	249.146	1.71666	0.00018174
Hydrogenophaga sp. NH-16	33.4193	5.23588	7.04792	9.30697	0.00018152
Fannyhessea vaginae	32.2771	228.16	33.2399	6.53525	0.000181434
Pseudomonas fulva	42.148	6.83482	3.83083	5.36042	0.000180909
Gordonia sp. PDNC005	34.1293	6.65905	22.0258	8.55533	0.000180836
Ancylobacter polymorphus	37.3953	10.135	5.70358	7.39446	0.000180786
Brevibacterium luteolum	29.0782	16.0627	10.0776	10.9337	0.000180609
Staphylococcus auricularis	29.0782	10.1076	10.0267	10.9959	0.000180526
Cupriavidus campinensis	36.2071	11.3914	5.4016	7.88145	0.000180511
Butyrivibrio hungatei	29.0782	346.359	178.253	3.22869	0.000180151
Brevibacillus brevis	33.8308	23.9158	11.3715	8.61678	0.000180146
Streptococcus equinus	29.0782	373.108	140.04	3.70616	0.000179978
Clostridium pasteurianum	29.0782	137.023	267.406	3.70616	0.000179129
Pseudomonas sp. M1	36.2071	7.24133	3.14111	7.77349	0.000178977
Treponema pallidum	30.2663	279.223	223.643	2.32447	0.000178626
Corynebacterium vitaeruminis	30.2663	28.0299	22.6083	9.68897	0.000178417
Thermobifida fusca	29.0782	617.002	82.4419	1.71666	0.000177957
Actinomyces sp. MAS-1	29.0782	348.786	128.484	3.95184	0.000177761
Dehalobacterium formicoaceticum	29.0782	316.239	233.19	2.05769	0.00017756
Helicobacter pylori	29.0782	193.539	100.685	6.38004	0.000177338
Rhizobium sp. 11515TR	46.6645	1.54294	1.00685	2.95988	0.000177202
Brevibacterium aurantiacum	29.0782	16.0729	6.11827	10.5233	0.000176937
Murdochiella vaginalis	29.0782	343.172	138.146	3.67922	0.000176784
Actinomyces weissii	29.0782	462.104	56.5047	3.99235	0.000176734
Cupriavidus sp. EM10	35.7038	14.0215	8.37629	7.4918	0.000176666
Actinomyces sp. oral taxon 169	29.0782	219.485	90.0976	6.16139	0.000176358
Paracoccus denitrificans	32.6427	27.0093	21.2231	8.38638	0.000176348
Bifidobacterium animalis	29.0782	63.3593	34.1146	9.21187	0.000175955
Schaalia sp. JY-X169	29.0782	399.932	100.845	3.67871	0.000175915
Erysipelothrix inopinata	29.0782	393.408	222.452	1.12773	0.000175893
Peptoclostridium acidaminophilum	29.0782	345.58	145.687	3.28984	0.000175323
Ruthenibacterium lactatiformans	33.8308	57.6173	83.7247	5.98342	0.00017525
Chryseobacterium camelliae	29.0782	171.817	297.591	2.08751	0.000175099
Duncaniella dubosii	29.0782	544.677	132.047	1.12329	0.000174996
Streptomyces parvulus	31.4545	33.2944	25.8581	8.5439	0.000174876
Corynebacterium pseudotuberculosis	29.981	10.5911	5.98067	9.90522	0.000174842
Streptococcus constellatus	29.0782	260.252	195.379	3.1865	0.000174836
Spiroplasma platyhelix	31.4545	90.3318	40.3103	7.52114	0.000174742
Synechococcus sp. JA-3-3Ab	35.019	11.129	12.5644	7.46724	0.00017462
Streptococcus pseudoporcinus	29.0782	208.593	217.399	3.25623	0.000174231
Parabacteroides johnsonii	29.0782	254.624	284.09	1.21149	0.000173897
Corynebacterium striatum	31.1954	10.325	8.44442	9.16344	0.000173752
Pseudomonas sp. TCU-HL1	35.019	9.31704	5.86329	7.4918	0.000173566
Simonsiella muelleri	30.2663	122.037	160.369	4.86439	0.00017318
Corynebacterium kutscheri	35.8718	17.7265	42.862	6.15494	0.000173174
Pseudomonas furukawaii	35.019	9.24443	6.36694	7.41846	0.000173097
Staphylococcus warneri	31.4545	37.8954	14.8705	8.46114	0.000172918
Chryseobacterium taklimakanense	32.6427	48.7098	28.553	7.46067	0.000172616
Neisseria cinerea	29.0782	93.4436	321.32	2.08135	0.000171803
Janibacter melonis	30.2663	16.4161	13.795	9.09698	0.000171578
Comamonas sp. Y33R10-2	30.2663	3.16261	7.60477	9.37895	0.000171484
Kytococcus sedentarius	31.4545	11.4432	8.75492	8.69253	0.000171275
Corynebacterium casei	34.4888	5.89975	4.86385	7.46067	0.000171108
Janibacter indicus	36.2071	3.78645	2.25871	6.71026	0.00017065
Hyphomicrobium nitrativorans	29.0782	248.168	148.705	3.75056	0.000170459
Actinomyces sp. Z16	29.0782	432.085	81.3278	2.93316	0.000170162
Tenuifilum thalassicum	29.0782	351.869	126.037	2.93316	0.000170103
Hymenobacter sp. BRD128	32.6427	66.8507	2.01369	7.46067	0.000170001
Streptococcus ferus	29.0782	238.758	152.275	3.70616	0.000169855
Staphylococcus pseudintermedius	29.0782	124.804	100.34	6.20194	0.000169784
Janibacter sp. CX7	32.2771	4.51692	6.12314	8.25844	0.000169748
Cardiobacterium sp. Marseille-Q4385	29.0782	211.32	191.608	3.15927	0.000169631
Streptococcus sp. HSISS3	29.0782	411.799	83.7613	3.04608	0.000169563
Citricoccus sp. SGAir0253	31.4545	15.0292	13.4368	8.25844	0.000169132
Candidatus Chazhemtobacterium aquaticus	33.5536	24.5494	21.9151	6.97511	0.000168811
Caproicibacterium lactatifermentans	29.0782	407.653	160.165	1.23316	0.000167988
Trueperella pecoris	34.4948	119.763	50.821	4.65974	0.000167975
Marmoricola scoriae	31.4545	10.7889	8.37629	8.25844	0.000167941
Haemophilus pittmaniae	29.0782	212.087	269.019	1.24454	0.000167905
Streptococcus sp. 1643	29.0782	278.06	144.391	3.13138	0.000167871
Faecalibacterium prausnitzii	29.981	46.5834	48.6144	7.5951	0.000167791
Rothia nasimurium	31.4545	47.0234	30.2054	7.28443	0.000167478
Mogibacterium pumilum	29.0782	388.07	136.459	1.88053	0.000167229
Aquella oligotrophica	31.1349	9.60371	34.2623	7.73892	0.000167067
Leptotrichia sp. oral taxon 218	29.0782	114.437	258.044	2.54168	0.000166976
Acinetobacter johnsonii	31.4545	10.7575	9.39819	8.10083	0.000166934
Blautia hansenii	29.0782	200.717	189.666	2.93316	0.000166693
Microlunatus sagamiharensis	31.3638	17.8889	8.37629	8.0265	0.00016656
Chryseobacterium sp. 6424	29.0782	112.112	185.975	4.06935	0.00016655
Ezakiella coagulans	29.0782	119.321	78.1054	6.29905	0.000166452
Ancylobacter pratisalsi	35.019	7.73164	4.02738	6.58857	0.000166441
Coraliomargarita akajimensis	31.4545	85.1742	44.5686	6.30457	0.000165949
Streptococcus sp. oral taxon 064	29.0782	263.634	148.641	2.93316	0.000165786
Anaerocolumna chitinilytica	29.0782	127.386	181.564	3.84931	0.000165588
Photobacterium damselae	30.2663	29.0698	36.3929	7.64427	0.000165572
Schaalia sp. ZJ405	29.0782	269.291	108.221	3.70109	0.000165514
Corynebacterium aurimucosum	30.3431	4.44093	6.71838	8.53114	0.000165433
Nocardioides coralli	31.1349	5.11871	4.24463	8.20583	0.000165319
Actinomyces sp. 432	34.8462	38.9534	30.6157	5.49374	0.00016482
Paracoccus sp. S8-55	30.2663	1.18136	1.97735	8.60826	0.000164698
Treponema denticola	29.0782	124.31	257.538	2.08751	0.000164419
Capnocytophaga leadbetteri	29.0782	87.0086	276.144	2.0998	0.000164133
Faecalicatena sp. Marseille-Q4148	29.0782	89.7832	290.565	1.71666	0.000163852
Saccharomonospora marina	29.0782	292.678	67.0103	4.02454	0.000163419
Clostridium sp. M62/1	31.4545	68.3758	138.208	4.13775	0.000163373
Sellimonas intestinalis	29.0782	253.999	98.8676	3.70616	0.00016268
Streptococcus parauberis	29.0782	235.413	171.497	2.35947	0.000162656
Pseudomonas entomophila	35.019	5.21987	5.03423	6.07394	0.000162564
Pseudomonas syringae	32.6427	8.56907	5.76714	7.08122	0.000162551
Atopobium sp. oral taxon 416	29.0782	391.353	36.9109	3.29833	0.000162097
Arachnia propionica	29.0782	65.2806	85.724	6.16139	0.000161793
Streptococcus chenjunshii	29.0782	219.428	183.526	2.10991	0.000161295
Corynebacterium minutissimum	31.1954	2.41792	4.94338	7.65229	0.000161289
Iamia sp. SCSIO 61187	32.6427	15.9855	3.60106	6.82882	0.000161002
Crassaminicella thermophila	29.0782	211.327	178.95	2.26097	0.000160953
Limosilactobacillus reuteri	30.2663	105.027	65.7036	5.45275	0.000160861
Paludibacter propionicigenes	29.0782	216.096	187.267	2.0043	0.000160812
Pseudomonas psychrotolerans	33.8308	4.90906	2.85179	6.38631	0.000160555
Fusobacterium hwasookii	29.0782	276.899	132.904	2.40281	0.000160532
Corynebacterium liangguodongii	31.4545	5.39334	16.796	7.10905	0.00016029
Saccharopolyspora gregorii	29.0782	216.066	118.641	3.39959	0.000160163
Ruficoccus sp. ZRK36	29.0782	191.697	228.386	1.24454	0.00015957
Aquihabitans sp. G128	31.4545	24.9065	8.75492	6.89704	0.000159188
Pseudomonas sp. DY-1	33.8308	10.4501	4.61371	6.02572	0.000158664
Ilumatobacter coccineus	30.2663	20.2872	6.92073	7.41273	0.000158352
Rhizobacter gummiphilus	29.0782	2.37947	2.12231	8.26585	0.000158346
Metamycoplasma salivarium	29.0782	113.893	290.185	0.593388	0.00015764
Muribaculum gordoncarteri	29.0782	226.72	172.792	1.74137	0.000157504
Paracoccus kondratievae	33.8308	2.89043	3.34086	5.98342	0.000157467
Duganella sp. AF9R3	30.2663	5.57607	9.42332	7.40281	0.000157356
Vibrio sp. ED002	32.6427	63.4084	30.0801	5.18142	0.000157301
Bacillus sp. FJAT-14266	31.1349	170.806	25.1284	4.63989	0.000157148
Streptococcus parasuis	31.4545	67.668	57.4624	5.04708	0.000157125
Staphylococcus saprophyticus	30.2663	28.8066	26.5288	6.6992	0.000156971
Pseudomonas sp. ADPe	36.2071	4.63845	2.87312	4.82116	0.000156834
Ezakiella massiliensis	32.6427	22.9413	7.83811	6.07864	0.000156749
Snodgrassella alvi	29.981	65.0459	142.602	3.82473	0.000156565
Janibacter limosus	29.0782	7.79201	3.41752	7.87527	0.000156148
Corynebacterium sp. CNCTC7651	32.2771	4.00325	3.49894	6.46181	0.000155976
Lactobacillus acidophilus	29.0782	86.6085	36.7388	6.16139	0.000155873
Levilactobacillus brevis	30.2663	39.7983	23.386	6.46529	0.000155724
Paraconexibacter sp. 02-257	30.2663	13.0615	3.35919	7.20992	0.00015563
Aminobacterium colombiense	29.0782	348.744	95.7345	1.66133	0.000155553
Latilactobacillus sakei	29.0782	63.9406	49.0195	6.12426	0.000155524
Micrococcus sp. KD337-16	30.2663	5.77263	6.12314	7.20992	0.000155417
Acidovorax antarcticus	29.0782	7.15356	10.8754	7.62209	0.000155408
Nocardioides sp. HDW12B	29.0782	20.5451	5.23518	7.57891	0.00015539
Actinomyces sp. oral taxon 171	29.0782	103.867	35.7472	5.87526	0.000155147
Anaerotruncus colihominis	29.0782	259.025	83.9745	2.94758	0.000155131
Treponema medium	29.0782	160.679	224.066	1.10728	0.000155073
Flavisolibacter ginsenosidimutans	30.2663	19.1256	5.49096	7.00857	0.000155026
Sphingomonas sp. S8-45	30.9668	9.84874	2.81481	6.84182	0.000154855
Glaesserella parasuis	29.0782	44.7939	259.033	1.71666	0.000154762
Corynebacterium renale	31.1349	17.5625	24.7155	6.15494	0.000154523
Bifidobacterium pullorum	30.2663	2.88146	1.06116	7.20992	0.000154347
Staphylococcus pasteuri	29.0782	7.04442	7.66165	7.54237	0.000154294
Coprococcus catus	31.4545	101.831	93.5966	3.46256	0.000154243
Bradyrhizobium sp. SK17	31.1349	0.551709	6.30186	6.69553	0.000154051
Terrihabitans soli	29.0782	190.037	170.533	1.76304	0.000154005
Petrocella atlantisensis	29.0782	141.893	159.202	2.58805	0.000153973
Furfurilactobacillus rossiae	29.0782	144.89	64.7305	4.58462	0.000153914
Alistipes onderdonkii	29.0782	298	74.5375	2.48708	0.000153715
Corynebacterium glutamicum	29.0782	22.5655	20.1369	6.99809	0.000153655
Varibaculum prostatecancerukia	29.981	20.3348	21.9638	6.48614	0.000152953
Capnocytophaga endodontalis	29.0782	244.594	134.26	1.71666	0.000152763
Metamycoplasma hominis	30.2663	189.615	189.593	0.651153	0.000152727
Corynebacterium diphtheriae	29.0782	17.6865	13.4079	7.03816	0.000152436
Enterocloster bolteae	29.0782	108.463	107.682	3.8871	0.000152345
Persephonella marina	30.2663	102.784	27.6829	5.14846	0.000152322
Streptococcus pantholopis	29.0782	198.28	100.93	2.93316	0.000152275
Clostridium aceticum	29.0782	127.182	165.193	2.40281	0.000152237
Roseomonas haemaphysalidis	32.6427	15.4897	2.91831	5.6458	0.000152086
Campylobacter sputorum	29.0782	81.1291	221.481	1.71666	0.00015202
Treponema succinifaciens	29.0782	230.733	101.563	2.47266	0.000151884
Alistipes indistinctus	29.0782	175.426	95.445	3.25623	0.000151735
Bacteroides fragilis	29.0782	93.2568	134.985	3.39959	0.000151735
Roseburia sp. NSJ-69	29.0782	218.055	164.886	1.23316	0.000151696
Loigolactobacillus coryniformis	29.0782	116.089	40.3598	5.13025	0.000151466
Corynebacterium propinquum	33.5357	5.51812	3.34086	5.2696	0.000151437
Weizmannia coagulans	29.0782	119.658	65.6051	4.53737	0.000151435
Massilia sp. NP310	31.4545	14.5678	3.74602	6.07367	0.000151358
Pseudomonas campi	33.8308	5.68183	4.18807	5.1043	0.000151343
Blattabacterium cuenoti	29.0782	206.294	101.691	2.65459	0.000151054
Corynebacterium timonense	32.0502	14.6805	12.6037	5.56439	0.000150992
Sediminicoccus rosea	31.4545	7.5572	7.50615	5.98835	0.000150698
Ruminococcus bicirculans	29.0782	231.574	104.019	2.2256	0.000150523
Staphylococcus pettenkoferi	29.0782	9.48544	9.90293	6.94343	0.000150436
Enterobacter hormaechei	32.6427	8.00651	10.8754	5.31944	0.000150269
Corynebacterium glaucum	30.0547	6.47177	6.36694	6.5905	0.000150229
Bacillus mycoides	29.0782	148.258	80.3875	3.70616	0.000150216
Thermomonospora amylolytica	30.813	5.66175	9.42332	6.16139	0.000149985
Candidatus Cloacimonas acidaminovorans	29.0782	159.16	72.7825	3.70616	0.000149979
Pseudomonas synxantha	32.6427	10.9389	8.0744	5.29418	0.000149898
Anaerococcus obesiensis	30.2663	22.5837	31.3524	5.71058	0.000149861
Comamonas aquatica	31.4545	9.65779	7.58372	5.84288	0.000149822
Acinetobacter pittii	31.4545	12.1431	7.79534	5.79362	0.000149714
Bifidobacterium adolescentis	30.2663	18.0677	7.90549	6.23653	0.000149599
Hymenobacter qilianensis	29.0782	12.6683	2.25871	6.94343	0.000149499
Treponema socranskii	29.0782	177.899	172.535	1.24454	0.000149393
Megamonas hypermegale	29.0782	156.321	69.0729	3.70616	0.00014913
Fusobacterium mortiferum	29.0782	23.0822	16.62	6.41089	0.000148789
[Ruminococcus] gnavus	29.0782	172.859	66.0773	3.51643	0.000148733
Vibrio cholerae	29.0782	86.8084	65.3341	4.56267	0.000148625
Pyramidobacter piscolens	29.0782	215.433	70.9136	2.86014	0.000148474
Mycoplasma suis	29.0782	341.953	104.704	0.593388	0.000148468
Brachybacterium sp. P6-10-X1	29.0782	11.7737	5.62961	6.68942	0.000148077
Austwickia chelonae	29.0782	213.704	126.036	1.6104	0.000147882
Desulfobulbus oralis	29.0782	217.202	61.5852	2.93316	0.000147681
Bernardetia litoralis	29.0782	152.846	182.481	1.08954	0.000147584
Bacteroides uniformis	29.0782	129.052	107.698	2.98157	0.000147492
Nanchangia anserum	29.0782	195.683	55.2537	3.29833	0.000147438
Anaerostipes caccae	29.0782	126.786	144.83	2.17684	0.000147269
Epidermidibacterium keratini	30.2663	15.5115	10.0514	5.90401	0.00014725
Muribaculum intestinale	29.0782	259.72	91.0047	1.71666	0.000147202
Gardnerella vaginalis	29.0782	20.6088	8.74734	6.3951	0.00014719
Kingella denitrificans	29.0782	83.5623	159.258	2.35947	0.000147044
Vaginimicrobium propionicum	29.0782	117.343	24.1602	4.8618	0.000146998
Micropruina glycogenica	30.2663	11.6803	8.91264	5.92016	0.000146842
Haemophilus sp. oral taxon 036	29.0782	50.8683	183.88	2.18308	0.000146737
Streptococcus merionis	29.0782	208.427	116.428	1.71666	0.000146658
Abyssicoccus albus	30.2663	12.7232	13.121	5.78013	0.000146573
Defluviicoccus vanus	29.0782	10.6052	3.83083	6.52624	0.000146475
Serpentinicella alkaliphila	29.0782	96.6424	80.1806	3.7651	0.000145978
Hymenobacter sp. 5420S-77	31.1349	11.1092	5.61902	5.4569	0.000145718
Rothia kristinae	29.981	29.0935	16.2332	5.51517	0.000145632
Lactococcus lactis	29.0782	53.92	40.6568	5.04178	0.000145268
Campylobacter geochelonis	31.1349	27.4557	76.5226	3.60422	0.000144811
Pediococcus damnosus	29.0782	77.3106	24.222	5.04178	0.000144742
Porphyromonas crevioricanis	29.0782	120.463	112.476	2.58805	0.00014457
Roseomonas sp. S08	31.4545	14.388	7.73693	5.06269	0.000144493
Humisphaera borealis	31.1349	24.1463	4.47892	5.14881	0.000144426
Staphylococcus succinus	32.2771	11.0462	5.23518	4.77718	0.00014441
Corynebacterium riegelii	29.0782	5.33856	10.3015	6.16139	0.000144335
Intestinibaculum porci	29.0782	54.7651	21.7509	5.31083	0.000144312
Clostridium beijerinckii	29.981	104.009	44.0449	3.82473	0.000144299
Romboutsia ilealis	29.0782	76.385	32.3083	4.81837	0.000144298
Candidatus Midichloria mitochondrii	31.1349	85.2327	31.6043	3.79645	0.000144243
Ottowia sp. oral taxon 894	30.2663	33.0095	54.6028	4.31618	0.000144191
Paucibacter sp. KCTC 42545	29.0782	1.25931	0.938268	6.37637	0.000144062
Neisseria bacilliformis	29.0782	145.669	122.292	1.98306	0.000143926
Streptococcus canis	29.0782	222.637	90.9821	1.71666	0.000143864
Natranaerofaba carboxydovora	29.0782	110.747	80.744	3.28984	0.000143816
Aminipila luticellarii	29.0782	218.349	76.5226	2.06888	0.000143773
Corynebacterium ammoniagenes	33.8308	2.84704	2.30686	4.15421	0.00014375
Flavobacterium sp. HJ-32-4	29.0782	101.992	65.7036	3.70616	0.000143706
Alistipes communis	29.981	95.5348	41.2209	3.8871	0.000143547
Neisseria arctica	29.981	24.187	70.1581	4.12015	0.000143487
Collinsella aerofaciens	30.2663	36.5944	9.50596	5.14846	0.000143462
Corynebacterium simulans	29.0782	4.14486	4.24463	6.18865	0.00014346
Propionibacterium freudenreichii	29.0782	4.5807	5.15795	6.16139	0.000143444
Burkholderia cenocepacia	29.0782	92.2558	38.4883	4.37147	0.000143404
Mitsuaria sp. 7	29.0782	1.17532	1.71932	6.26277	0.000143338
Klebsiella variicola	31.4545	15.5686	18.0397	4.65713	0.000143244
Blautia obeum	30.2663	20.2866	17.1051	5.14846	0.000143212
Nocardioides aquaticus	29.0782	4.48992	3.74602	6.16139	0.00014321
Paenibacillus physcomitrellae	29.0782	151.305	57.3024	3.21151	0.000143132
Blautia pseudococcoides	29.0782	153.183	69.0729	2.93316	0.000143123
Mammaliicoccus sciuri	30.2663	42.2002	27.5901	4.63989	0.000143093
Ligilactobacillus ruminis	29.0782	117.99	53.0861	3.70109	0.000143088
Lachnoclostridium phocaeense	29.0782	86.9817	70.2207	3.70109	0.000143042
Bacteroides cellulosilyticus	29.0782	136.076	96.8902	2.5249	0.000143012
Bacteroides intestinalis	29.981	152.82	75.8568	2.35947	0.000142925
Staphylococcus cohnii	29.0782	6.58092	2.7008	6.11006	0.00014285
Dermacoccus nishinomiyaensis	30.2663	3.83019	15.9075	5.31886	0.000142802
Wielerella bovis	29.0782	41.6549	93.663	3.70616	0.000142754
Anaerotignum propionicum	29.0782	71.0013	33.5197	4.63939	0.000142682
Hydrogenophilus thermoluteolus	30.2663	10.2632	11.8641	5.2918	0.000142533
Massilia oculi	31.4545	11.4742	4.69134	4.88557	0.000142432
Corynebacterium falsenii	29.981	7.34614	8.05476	5.51517	0.000142368
Desulfosporosinus youngiae	29.0782	194.023	96.8902	1.71666	0.000142236
Lapidilactobacillus dextrinicus	29.0782	15.6982	6.83505	5.82433	0.000142215
Chondromyces crocatus	30.2663	76.7913	36.5237	3.9065	0.000142201
Alistipes megaguti	29.0782	304.48	55.2825	1.26925	0.000142197
Staphylococcus argenteus	29.981	27.609	21.0695	4.94031	0.000142015
Amniculibacterium sp. G2-70	29.0782	86.74	183.395	1.12017	0.000142013
Anoxybacillus flavithermus	29.0782	25.0495	10.4968	5.59521	0.000141945
Heyndrickxia vini	31.4545	18.2477	8.56558	4.61142	0.000141631
Changpingibacter yushuensis	29.0782	160.411	19.0354	3.70616	0.000141492
Corynebacterium incognita	31.1349	4.69311	12.3578	4.80375	0.000141382
Christensenella minuta	29.0782	107.827	69.9787	3.22869	0.000141378
Escherichia fergusonii	30.2663	64.1957	43.5017	3.79645	0.00014137
Proteiniphilum sp. JNU-WLY501	29.0782	175.515	45.4791	2.93316	0.000141356
Corynebacterium stationis	29.0782	7.71744	18.5711	5.55031	0.000141346
Serratia marcescens	29.0782	45.7103	69.104	3.99235	0.000141309
Corynebacterium occultum	32.6427	5.49551	16.9562	4.00867	0.000141308
Treponema peruense	29.0782	120.319	101.714	2.37389	0.000141249
Solibacillus silvestris	29.981	60.375	54.6028	3.70616	0.000141186
Streptomyces mobaraensis	31.4545	13.0025	6.04107	4.65974	0.000141113
Anaerocolumna cellulosilytica	29.0782	143.385	118.092	1.71666	0.000141076
Parabacteroides merdae	29.0782	225.986	73.071	1.63518	0.000140696
Gudongella oleilytica	29.0782	74.7991	48.8132	3.99235	0.000140678
Candidatus Endolissoclinum faulkneri	30.2663	39.2037	14.074	4.63989	0.000140661
Nocardioides sp. S5	29.0782	8.70768	3.46028	5.74894	0.000140489
Corynebacterium frankenforstense	30.2663	1.8902	8.55537	5.17408	0.000140379
Sphingomonas sp. AAP5	31.4545	5.38401	5.4016	4.65974	0.000140326
Kocuria rosea	30.2663	10.3429	4.50133	5.14846	0.000140301
Tannockella kyphosi	29.0782	147.826	63.6147	2.7263	0.000140236
Corynebacterium rouxii	30.2663	13.915	4.27191	5.09783	0.00014021
Acetoanaerobium sticklandii	29.0782	114.687	110.294	2.11557	0.000140202
Streptococcus ratti	29.0782	146.123	94.5811	2.06915	0.00014017
Streptococcus acidominimus	29.0782	94.5906	83.3205	2.93316	0.000140134
Sphingomonas aerolata	31.4545	10.1437	0.874734	4.65974	0.000140029
Corynebacterium testudinoris	30.2663	15.4732	6.11827	5.0091	0.000139989
Arachnia rubra	29.0782	33.2959	28.8357	4.81456	0.000139839
Methylomusa anaerophila	29.0782	202.467	75.6588	1.74137	0.000139781
Candidatus Absconditicoccus praedator	29.0782	26.4243	70.187	3.99235	0.000139748
Lactococcus raffinolactis	31.4545	13.7879	9.55041	4.38392	0.000139702
Capnocytophaga sp. oral taxon 878	29.0782	57.9648	103.615	2.85988	0.000139545
Conexibacter woesei	31.4545	9.47324	2.30686	4.56237	0.000139477
Streptococcus pluranimalium	29.0782	157.398	81.7403	2.10991	0.000139432
Alkalicella caledoniensis	29.0782	61.5559	101.44	2.82982	0.000139298
Lacticaseibacillus rhamnosus	29.0782	60.2506	53.3807	3.88087	0.000139275
Listeria innocua	29.0782	66.9357	57.6363	3.70616	0.000139263
Noviherbaspirillum sp. UKPF54	30.2663	3.19764	1.97735	5.14846	0.000139255
Nosocomiicoccus ampullae	29.0782	22.3928	21.9638	5.01076	0.000139213
Clostridium sp. MD294	29.0782	75.1635	88.4587	2.93316	0.00013921
Campylobacter hominis	29.0782	55.9138	123.544	2.40281	0.000139165
Lactobacillus acetotolerans	29.0782	88.7593	43.2253	3.67871	0.000138716
Saccharibacillus brassicae	30.2663	16.0871	4.55023	4.85254	0.000138634
Lactobacillus johnsonii	29.0782	12.1411	7.34193	5.35628	0.00013851
Bibersteinia trehalosi	29.0782	81.9809	154.18	1.32584	0.000138434
Campylobacter cuniculorum	29.0782	221.459	58.3319	1.69571	0.000138379
Blautia argi	29.0782	91.434	98.8676	2.37389	0.000138196
Fusobacterium gastrosuis	29.0782	77.4964	44.0516	3.70616	0.000138039
Anaerocolumna sedimenticola	29.0782	63.7547	143.358	1.71666	0.000137958
Mucilaginibacter rubeus	30.2663	12.2525	12.0352	4.63989	0.000137911
Variovorax paradoxus	30.2663	7.04442	3.18347	4.87717	0.000137784
Pirellula sp. SH-Sr6A	29.0782	184.408	42.5131	2.40281	0.000137753
Raoultibacter timonensis	29.0782	108.792	22.5871	3.75056	0.000137748
Arcanobacterium haemolyticum	31.4545	19.5763	8.56558	4.02672	0.00013742
Sneathia vaginalis	29.0782	111.442	89.1263	2.2256	0.000137338
Rhodococcus opacus	30.2663	16.312	5.74624	4.63989	0.00013727
Microlunatus phosphovorus	29.0782	5.03725	5.70358	5.31038	0.000137269
Christensenella sp. Marseille-P3954	29.0782	178.135	30.7735	2.66496	0.000137252
Conexibacter sp. DBS9H8	30.2663	39.0419	12.134	4.21866	0.000137216
Pedobacter roseus	30.2663	54.9908	54.5893	3.09073	0.00013709
Candidatus Nanosynbacter featherlites	29.0782	149.083	73.1849	2.06888	0.000137011
Solibaculum mannosilyticum	29.0782	97.684	26.9204	3.67871	0.00013691
Corynebacterium uberis	29.981	13.4622	14.2589	4.56847	0.000136899
Hymenobacter sedentarius	30.2663	10.8362	6.06698	4.63989	0.000136829
Nesterenkonia sp. NBAIMH1	29.0782	63.3029	29.6603	4.02454	0.000136818
Bacillus halotolerans	29.0782	58.3252	32.4722	3.99235	0.000136582
Thermomicrobium roseum	29.0782	16.9202	6.92057	5.04178	0.000136543
Arthrobacter alpinus	30.2663	11.4534	3.67096	4.63989	0.000136501
Bradyrhizobium sp. 200	29.0782	3.56337	6.36694	5.20851	0.000136489
Paeniclostridium sordellii	29.0782	147.36	63.4313	2.2256	0.000136456
Candidatus Kaistella beijingensis	29.0782	88.0443	139.265	1.29092	0.000136334
Weissella cibaria	29.0782	73.0431	36.855	3.67871	0.000136284
Phototrophicus methaneseepsis	29.0782	81.5513	26.9204	3.78747	0.000136265
Rothia terrae	29.0782	6.78228	4.45632	5.17365	0.000136214
Fastidiosipila sanguinis	29.0782	126.365	49.8743	2.72464	0.000136095
Tetragenococcus halophilus	29.0782	92.5865	56.9577	2.98157	0.000136094
Kocuria sp. TGY1127_2	31.4545	7.69207	6.77614	4.02672	0.000136065
Leptotrichia sp. oral taxon 498	29.0782	83.3516	75.7574	2.68254	0.000136057
Ilyobacter polytropus	29.0782	90.9629	94.109	2.18308	0.000135979
Leptotrichia sp. oral taxon 847	29.0782	70.0955	75.5134	2.8372	0.000135972
Lacticaseibacillus paracasei	29.0782	41.0161	34.2623	4.08067	0.000135966
Bacillus cytotoxicus	29.0782	49.3041	33.105	3.99235	0.000135872
Streptococcus urinalis	29.0782	82.5729	63.2086	2.93316	0.000135836
Carnobacterium maltaromaticum	29.981	37.4937	20.7622	3.99235	0.000135834
Ruminococcus albus	29.0782	120.682	53.0797	2.65459	0.000135579
Geobacillus subterraneus	29.0782	136.957	43.2128	2.66496	0.00013554
Blautia sp. SC05B48	29.0782	27.039	15.9147	4.58462	0.000135506
Ruminiclostridium herbifermentans	29.0782	123.815	37.1405	2.93316	0.000135373
Yersinia pestis	29.0782	32.4261	52.4836	3.70616	0.000135336
Nocardioides okcheonensis	31.4545	32.6767	4.94338	3.64899	0.00013522
Fibrobacter succinogenes	29.0782	57.1529	24.4996	3.99235	0.000135201
Shewanella baltica	29.0782	88.8259	60.3178	2.82982	0.00013517
Mageeibacillus indolicus	29.0782	111.405	57.587	2.61172	0.000135148
Blautia liquoris	29.0782	30.6392	38.9928	3.99235	0.000135136
Psychrobacillus glaciei	29.0782	43.641	44.3935	3.70616	0.00013505
Pseudocnuella soli	30.2663	21.2841	7.79856	4.23114	0.000135018
Steroidobacter denitrificans	29.0782	6.35364	2.7008	5.05174	0.000134992
Histophilus somni	31.4545	41.1047	71.121	2.08329	0.000134971
Corynebacterium singulare	29.981	8.03135	5.03423	4.56847	0.000134935
Corynebacterium gerontici	30.2663	13.8708	2.30627	4.42735	0.000134926
Clostridium cellulovorans	29.0782	126.631	25.4678	3.08942	0.000134916
Gloeomargarita lithophora	29.0782	30.0389	44.5448	3.84931	0.000134911
Chryseobacterium piperi	29.0782	61.5411	125.51	1.71666	0.000134903
Halobacteriovorax marinus	29.0782	21.4304	22.3511	4.43211	0.000134902
Prevotella sp. E2-28	29.0782	172.395	83.3205	1.26808	0.000134798
Propionibacterium australiense	30.2663	32.4879	20.1118	3.79645	0.000134776
Streptomyces venezuelae	29.0782	13.0679	6.68448	4.83446	0.000134624
Limosilactobacillus vaginalis	29.0782	59.7712	32.295	3.70616	0.000134564
Desulfitobacterium hafniense	29.0782	87.6928	98.8676	1.91437	0.000134456
Burkholderia mallei	29.0782	15.7582	16.1488	4.56847	0.00013441
Clostridium manihotivorum	29.0782	52.5291	21.9638	3.99235	0.00013438
Flavobacterium davisii	29.0782	119.992	32.3203	2.93316	0.000134258
Corynebacterium mustelae	31.4545	4.42192	8.95784	3.77099	0.000134226
Bacteroides helcogenes	29.0782	132.381	25.1289	2.93316	0.000134221
Treponema pedis	29.0782	56.9971	148.792	1.16224	0.000134114
Legionella pneumophila	29.0782	19.861	16.7043	4.46008	0.000134065
Corynebacterium uterequi	29.0782	5.58952	3.83083	4.90527	0.000134019
Actinomyces viscosus	29.0782	59.4294	28.8085	3.70616	0.000133976
Parabacteroides distasonis	29.0782	90.1144	61.5471	2.61172	0.000133867
Arsenophonus nasoniae	29.0782	36.1456	33.3098	3.87234	0.000133833
Mahella australiensis	30.2663	73.2203	23.0348	3.10332	0.000133773
Larkinella sp. IE-0392	29.0782	89.3583	78.7356	2.2256	0.00013369
Corynebacterium pseudodiphtheriticum	30.813	7.14968	4.47892	4.04911	0.000133684
Roseateles depolymerans	29.0782	2.24573	5.93205	4.85187	0.000133659
Periweissella cryptocerci	29.0782	38.96	24.4926	3.99235	0.000133564
Phycicoccus endophyticus	29.0782	8.40907	1.67523	4.85189	0.000133532
Chthonomonas calidirosea	31.4545	14.6083	10.0226	3.51703	0.000133431
Sandaracinus amylolyticus	29.0782	11.3995	5.76714	4.71314	0.000133428
Conexibacter sp. SYSU D00693	30.2663	12.1746	2.09407	4.24974	0.000133424
Lactobacillus ultunensis	29.0782	38.2525	19.7735	4.08067	0.0001334
Meiothermus silvanus	29.0782	39.1664	11.8641	4.23344	0.000133348
Rhodococcus qingshengii	29.0782	23.9507	8.75492	4.46934	0.000133229
Streptococcus marmotae	29.0782	141.161	69.2073	1.71666	0.000133054
Bacteroides ovatus	29.981	177.013	81.7513	0.593388	0.000132964
Campylobacter curvus	29.0782	36.4828	127.26	1.71666	0.00013293
Sporomusa termitida	29.0782	166.861	30.364	2.2256	0.000132919
Propionibacterium acidifaciens	29.0782	60.7093	7.32925	3.99235	0.000132774
Mesobacillus foraminis	29.0782	37.7547	19.9625	3.99235	0.000132731
Janthinobacterium sp. 17J80-10	29.0782	16.0986	10.0267	4.46934	0.000132727
Conchiformibius steedae	29.0782	16.4161	44.5632	3.70616	0.000132629
Bacteroides coprosuis	29.0782	45.8016	29.317	3.67871	0.000132628
Pseudoclavibacter sp. Marseille-Q3772	29.0782	5.13888	2.23946	4.74558	0.000132541
Acinetobacter junii	30.0547	9.99078	3.67096	4.21568	0.000132525
Aeromonas salmonicida	29.0782	44.4167	28.1481	3.70616	0.00013252
Corynebacterium humireducens	29.981	34.0945	15.1674	3.70616	0.000132513
Amycolatopsis aidingensis	29.0782	94.7989	20.1189	3.25623	0.000132433
Lysinibacillus sphaericus	29.0782	31.6051	11.1408	4.21568	0.000132421
Lentibacillus sp. CBA3610	29.0782	50.1826	24.2679	3.70616	0.000132418
Brucella anthropi	29.0782	27.7923	13.7545	4.2032	0.000132403
Actinobaculum sp. 313	29.0782	42.2869	21.9638	3.84973	0.000132402
Acinetobacter sp. LoGeW2-3	29.0782	39.6058	30.0677	3.70616	0.000132395
Fluviicola taffensis	29.0782	23.2946	15.3233	4.21568	0.000132343
Candidatus Velamenicoccus archaeovorus	29.0782	21.868	25.7847	3.99235	0.000132234
Romboutsia sp. CE17	29.0782	120.411	55.547	2.15106	0.00013222
Candidatus Promineofilum breve	29.0782	39.2194	20.7061	3.88087	0.000132156
Candidatus Contubernalis alkalaceticum	29.0782	44.98	12.2498	3.99235	0.000132147
Pseudarthrobacter sp. L1SW	30.2663	6.23713	7.49203	4.03084	0.000132133
Eggerthella lenta	29.0782	71.9957	28.9541	3.29833	0.000132108
Coprothermobacter proteolyticus	29.0782	44.2847	24.9004	3.70616	0.000131989
Corynebacterium choanae	29.0782	14.3793	28.2604	3.99235	0.000131957
Pseudomonas taetrolens	30.2663	11.1707	6.55553	3.96583	0.000131945
Streptococcus himalayensis	29.0782	107.066	81.4051	1.71666	0.00013194
Candidatus Liberibacter asiaticus	29.0782	81.9432	38.3981	2.94758	0.000131916
Telmatocola sphagniphila	31.4545	8.26743	4.02738	3.51703	0.000131902
Cytobacillus oceanisediminis	29.0782	35.3375	15.811	3.99235	0.000131849
Laceyella sacchari	29.0782	49.3354	21.1588	3.70163	0.00013181
Staphylococcus xylosus	29.0782	33.3095	21.2344	3.8871	0.000131755
Thermobispora bispora	29.0782	13.6602	7.90549	4.4119	0.000131743
Fuerstiella marisgermanici	29.0782	26.6273	9.68928	4.21568	0.000131741
Alkaliphilus metalliredigens	29.0782	110.001	43.5074	2.47266	0.000131739
Clostridium carboxidivorans	29.0782	42.9029	25.3754	3.67871	0.000131737
Bacillus licheniformis	29.0782	29.5143	18.3548	3.99235	0.000131733
Tropheryma whipplei	29.0782	28.0398	18.9056	3.99235	0.000131688
Iocasia fonsfrigidae	29.0782	69.6854	23.1574	3.39023	0.000131654
Tissierella sp. JN-28	29.0782	7.22127	5.5704	4.52621	0.000131637
Lysinibacillus timonensis	29.0782	35.0801	27.6412	3.70616	0.000131599
Anoxybacter fermentans	29.0782	42.0832	23.7282	3.70109	0.000131565
Faecalitalea cylindroides	29.0782	46.4915	20.9403	3.70616	0.000131553
Ornithobacterium rhinotracheale	29.0782	69.9914	37.9186	3.04608	0.000131494
Thermoanaerobacterium thermosaccharolyticum	29.0782	35.4788	14.9908	3.95184	0.000131431
Enterococcus avium	29.0782	40.2441	23.2108	3.70616	0.000131355
Blastococcus saxobsidens	29.0782	8.476	8.10239	4.4119	0.000131308
Vagococcus penaei	29.0782	70.6751	27.3014	3.22829	0.000131206
Pseudomonas cavernae	30.2663	10.6258	8.44442	3.8311	0.000131201
Salinibacter ruber	29.0782	76.7823	21.4578	3.27466	0.000131164
Parageobacillus thermoglucosidasius	29.0782	36.804	23.6178	3.70616	0.000131111
Flavonifractor plautii	29.0782	22.832	7.20213	4.21568	0.000131002
Ignavigranum ruoffiae	29.0782	13.6061	8.37613	4.30073	0.00013099
Candidatus Annandia pinicola	29.0782	7.88278	15.1027	4.21568	0.000130921
Symbiobacterium thermophilum	29.0782	29.264	13.4018	3.99235	0.000130918
Truepera radiovictrix	29.0782	26.3553	11.5343	4.04911	0.000130778
Labilithrix luteola	29.0782	11.9491	12.3578	4.2032	0.000130755
Corynebacterium efficiens	30.2574	9.35717	4.68252	3.86954	0.00013074
Pelosinus sp. UFO1	29.0782	93.2482	40.372	2.60323	0.000130698
Hirschia baltica	29.0782	58.4721	17.5711	3.51643	0.000130686
[Clostridium] scindens	29.0782	180.99	31.8411	1.71666	0.000130656
Hymenobacter sp. 5116S-3	29.0782	19.4288	3.02054	4.30073	0.000130656
Candidatus Carsonella ruddii	29.0782	26.165	26.3566	3.70616	0.000130592
Sorangium cellulosum	29.981	25.395	9.90293	3.66418	0.000130578
Conexibacter sp. S30A1	29.0782	9.47324	2.42232	4.41275	0.000130495
Deinococcus sp. KNUC1210	30.2663	1.6321	1.87301	3.97753	0.000130425
Comamonas testosteroni	29.0782	27.8875	18.9056	3.81557	0.000130365
Streptococcus respiraculi	29.0782	77.0926	70.9719	2.08751	0.000130322
Enterobacter cloacae	29.0782	34.3351	18.0053	3.75056	0.00013032
Pediococcus acidilactici	29.0782	39.4791	18.1964	3.67871	0.000130281
Corynebacterium comes	34.1293	3.65239	3.34086	2.16213	0.000130226
Limnohabitans sp. 103DPR2	29.0782	4.43826	5.4016	4.37147	0.000130213
Intestinimonas butyriciproducens	29.0782	55.0165	20.9403	3.39959	0.000130049
Burkholderia thailandensis	29.0782	9.93855	16.148	4.04954	0.000130043
Streptomyces albidoflavus	29.0782	12.6411	5.86329	4.21568	0.000129871
Piscirickettsia salmonis	29.0782	33.2845	17.8253	3.70616	0.000129867
Vibrio parahaemolyticus	29.0782	31.3108	18.0528	3.70616	0.000129726
Bacillus pseudomycoides	29.0782	25.5407	7.9094	3.99235	0.000129704
Verrucomicrobium spinosum	29.981	15.6537	7.73693	3.70616	0.000129666
Saprospira grandis	29.0782	20.1724	13.4368	3.92034	0.000129573
Owenweeksia hongkongensis	29.0782	10.544	12.646	4.04954	0.000129537
Bacteroides eggerthii	29.0782	94.0858	29.3165	2.66496	0.000129462
Caldilinea aerophila	29.0782	15.5855	7.90549	4.06935	0.000129379
Candidatus Planktophila lacus	30.2574	6.70485	2.44731	3.7651	0.00012937
Bifidobacterium pseudolongum	29.0782	26.3096	11.7035	3.84973	0.000129324
Urbifossiella limnaea	30.2663	14.0511	2.25871	3.66951	0.000129322
Pseudoclostridium thermosuccinogenes	30.2663	96.1412	41.2838	1.82654	0.000129298
Clavibacter michiganensis	29.0782	6.62694	5.5681	4.21568	0.000129283
Alistipes finegoldii	29.0782	117.74	42.4688	2.06888	0.000129278
Brevibacterium linens	30.2663	22.7029	8.42854	3.42178	0.000129252
Pantoea agglomerans	29.0782	8.96454	6.71838	4.15165	0.000129203
Fusobacterium necrophorum	29.0782	168.621	81.2112	0.593388	0.000129124
Alysiella crassa	29.0782	40.7307	98.8676	1.76304	0.000129113
Candidatus Sulfidibacterium hydrothermale	29.0782	73.6991	26.1077	2.93316	0.000129102
Polynucleobacter necessarius	29.0782	11.8743	11.5174	3.99235	0.000129053
Elizabethkingia sp. JS20170427COW	29.0782	54.5505	69.2057	2.2256	0.000129035
Peribacillus frigoritolerans	30.2663	20.535	12.0821	3.3384	0.000129024
Corynebacterium doosanense	30.0547	4.29757	5.93205	3.76003	0.000129
Planococcus sp. 107-1	29.0782	26.9029	15.7452	3.70616	0.000128961
Limosilactobacillus mucosae	29.0782	35.0254	11.1362	3.70616	0.000128954
Klebsiella quasipneumoniae	29.0782	18.9592	18.0397	3.75056	0.000128943
Campylobacter sp. RM16192	29.0782	21.5217	93.8553	2.06888	0.000128849
Roseburia intestinalis	29.0782	39.8369	21.9638	3.39959	0.000128848
Mannheimia haemolytica	29.0782	31.238	161.488	0.488259	0.000128837
Corynebacterium yudongzhengii	30.0547	3.54407	2.25871	3.81557	0.000128756
Elusimicrobium minutum	29.0782	40.7863	7.9094	3.67922	0.000128756
Corynebacterium ulcerans	29.981	6.9613	6.68172	3.70616	0.000128716
Clostridium cadaveris	29.0782	12.146	33.615	3.46337	0.000128695
Marinilactibacillus sp. 15R	29.0782	12.6129	7.90549	3.99235	0.000128541
Metabacillus sp. KUDC1714	29.0782	11.6148	7.26696	4.01538	0.00012852
Fenollaria massiliensis	29.0782	4.07747	2.44731	4.2032	0.000128462
Bacillus sp. KH172YL63	29.0782	24.3761	13.9957	3.70616	0.000128454
Haploplasma axanthum	29.0782	29.413	25.6133	3.39023	0.000128426
Corynebacterium sp. sy039	30.0547	2.68605	5.4016	3.70616	0.000128371
Aureliella helgolandensis	29.0782	106.605	12.2549	2.7263	0.000128312
Novisyntrophococcus fermenticellae	29.0782	21.8064	33.0387	3.30301	0.000128284
Staphylococcus simulans	29.0782	11.7958	6.68448	3.99235	0.000128272
Aeromonas veronii	29.0782	18.5317	15.9075	3.70616	0.000128234
Hymenobacter sp. 5317J-9	29.0782	12.7741	4.39277	4.02454	0.000128232
Segniliparus rotundus	29.0782	15.984	10.0226	3.84973	0.000128127
Streptomyces nodosus	29.0782	15.284	8.78554	3.88087	0.000128096
Singulisphaera acidiphila	29.0782	15.8378	3.83083	3.97543	0.000128054
Ferruginibacter sp. KIS38-8	29.0782	14.289	3.74602	3.99235	0.000128026
Staphylococcus schleiferi	29.0782	9.85329	11.0753	3.88087	0.000127974
Candidatus Filomicrobium marinum	29.0782	6.69551	6.11827	4.01538	0.000127894
Mannheimia varigena	29.0782	36.703	95.5549	1.71666	0.000127877
Actinobacillus sp. GY-402	29.0782	42.7265	121.676	1.0755	0.00012785
Capnocytophaga canimorsus	29.0782	16.4621	14.4043	3.70616	0.000127807
Geodermatophilus obscurus	29.0782	6.27458	4.24463	4.04911	0.000127806
Flavisolibacter tropicus	29.0782	19.1738	2.87312	3.92034	0.000127793
[Clostridium] innocuum	29.0782	44.5246	14.8301	3.35157	0.000127773
Mangrovivirga cuniculi	29.0782	80.3124	48.6982	2.18308	0.000127755
Vibrio vulnificus	29.0782	15.1618	14.6816	3.70616	0.000127735
Geobacillus sp. GHH01	29.0782	25.0034	10.0267	3.67871	0.000127672
Ethanoligenens harbinense	29.0782	13.5709	7.04792	3.88087	0.000127664
Rhodocaloribacter litoris	29.0782	28.7425	8.42854	3.66418	0.000127645
Lactiplantibacillus pentosus	30.2663	22.873	12.919	3.10332	0.000127628
Olsenella timonensis	29.0782	16.4075	7.79856	3.82473	0.000127624
Sterolibacterium denitrificans	29.0782	4.58135	2.42232	4.08067	0.000127596
Staphylococcus condimenti	29.0782	17.3009	12.2498	3.70616	0.000127538
Capnocytophaga sp. FDAARGOS_737	29.0782	49.8544	92.5214	1.56991	0.000127487
Fibrella sp. ES10-3-2-2	29.0782	13.962	13.7545	3.70616	0.000127479
Terrisporobacter sp. MCA3	29.0782	60.7937	22.2139	2.94758	0.000127425
Streptococcus sp. CNU G3	29.0782	126.96	69.4398	1.12017	0.000127396
Spiroplasma endosymbiont of 'Nebria riversi'	29.0782	30.3697	44.4904	2.82982	0.000127381
Staphylococcus saccharolyticus	29.0782	5.69059	3.22976	4.0149	0.000127338
Actinopolyspora erythraea	29.0782	14.7733	12.3578	3.70616	0.000127328
Caloramator sp. E03	29.0782	57.9472	33.957	2.71298	0.00012731
Desulfurispirillum indicum	29.0782	11.5464	8.37629	3.82473	0.000127279
Mesomycoplasma bovoculi	29.0782	137.837	57.3432	1.23316	0.000127276
Clostridium sp. M3/9	29.0782	65.7949	33.7141	2.61765	0.000127271
Hymenobacter sp. PAMC 26628	30.2663	13.3481	3.67096	3.36731	0.000127247
Vibrio alginolyticus	30.2663	35.6733	13.7545	2.87169	0.000127197
Arthrobacter sp. Helios	29.0782	15.0404	10.3782	3.72312	0.000127161
Bacillus sp. ZY-1-1	29.0782	18.0377	8.90896	3.70616	0.00012707
Flintibacter sp. KGMB00164	29.0782	37.3742	33.5052	2.93947	0.000127066
Ruminococcus bovis	29.0782	141.864	12.1746	2.11869	0.000126969
Phoenicibacter congonensis	29.0782	79.9577	23.9427	2.61172	0.000126937
Alkalibacter sp. ES005	29.0782	112.972	46.7913	1.71666	0.000126933
Hymenobacter sp. BT18	29.0782	18.4169	9.62208	3.66418	0.000126907
Alkaliflexus sp. Ai-910	29.0782	61.7684	31.4111	2.66496	0.000126891
Acidothermus cellulolyticus	29.0782	4.4476	7.20213	3.88087	0.000126869
Streptococcus halichoeri	29.0782	76.0276	48.9462	2.10991	0.000126868
Fusobacterium periodonticum	29.0782	44.774	84.575	1.71666	0.000126846
Keratinibaculum paraultunense	29.0782	90.8037	40.2237	2.11557	0.000126843
Pseudobacter ginsenosidimutans	29.0782	23.6053	4.45448	3.70163	0.000126824
Macrococcus canis	29.0782	12.3761	10.5348	3.70616	0.000126821
Filimonas lacunae	29.0782	16.7237	5.23518	3.76057	0.000126767
Actinomyces respiraculi	29.0782	43.1617	14.6839	3.22829	0.000126714
Massilia sp. WG5	29.0782	13.0694	5.65208	3.78801	0.000126708
Aeoliella mucimassa	29.0782	186.933	33.4224	1.0755	0.000126695
Cruoricaptor ignavus	29.0782	35.4148	36.9511	2.83783	0.000126688
Arthrobacter crystallopoietes	29.0782	14.5805	8.55537	3.70109	0.000126665
Morococcus cerebrosus	29.0782	46.277	104.8	1.23316	0.000126636
Bacillus safensis	29.0782	11.0005	7.26696	3.7651	0.000126611
Tepidiforma bonchosmolovskayae	29.0782	10.5803	10.0267	3.70109	0.000126541
Lactobacillus amylovorus	29.0782	13.5252	7.9094	3.70616	0.000126504
Aerococcus urinae	29.981	27.8395	16.8571	2.93316	0.000126496
Clostridium sp. 'deep sea'	29.0782	26.5368	19.7675	3.28984	0.000126488
Treponema phagedenis	29.0782	30.6083	117.905	1.12017	0.000126487
Paenibacillus sp. JNUCC-31	29.0782	10.4121	9.45625	3.70616	0.000126472
Pectobacterium carotovorum	30.2663	7.35482	9.90293	3.20062	0.00012647
Corynebacterium kalinowskii	29.0782	4.81685	10.4566	3.75056	0.000126458
Streptococcus porcinus	29.0782	80.4123	62.1146	1.71666	0.000126457
Kingella potus	29.0782	25.539	47.1166	2.70545	0.000126446
Corynebacterium halotolerans	29.0782	16.6241	5.59865	3.70616	0.000126413
Lactobacillus panisapium	29.0782	29.8751	11.4925	3.41291	0.000126376
Sporosarcina sp. P37	30.2663	11.4956	8.61936	3.16487	0.000126372
Lactiplantibacillus paraplantarum	29.0782	9.40117	8.95784	3.70616	0.000126301
Aneurinibacillus soli	29.0782	16.7559	5.93205	3.67871	0.000126275
Bacillus wiedmannii	29.0782	34.3795	18.3694	3.19517	0.000126268
Heyndrickxia oleronia	29.0782	32.0662	14.5339	3.29833	0.000126211
Shewanella pealeana	29.0782	35.4917	29.113	2.93316	0.000126147
Klebsiella aerogenes	29.0782	7.19569	9.22742	3.70616	0.000126146
Thermoactinomyces vulgaris	29.0782	28.1143	16.281	3.29833	0.000126135
Caldibacillus thermoamylovorans	29.0782	6.41396	5.59865	3.78747	0.000126097
Lentilactobacillus buchneri	29.0782	12.8927	5.64678	3.70616	0.000126085
Bacteroides thetaiotaomicron	29.0782	35.3054	28.8085	2.93316	0.000126081
Haliscomenobacter hydrossis	29.0782	8.77232	2.85179	3.81557	0.000126078
Melioribacter roseus	29.0782	23.0975	22.7512	3.21151	0.000126076
Neobacillus drentensis	29.0782	19.6779	10.4566	3.51643	0.00012606
Corynebacterium camporealensis	29.0782	13.7067	4.75298	3.70616	0.000126015
Peribacillus psychrosaccharolyticus	29.0782	8.99202	7.26696	3.70616	0.000125994
Acutalibacter muris	30.2663	28.4882	12.2365	2.81416	0.000125882
Novibacillus thermophilus	29.0782	50.5753	18.9056	2.93316	0.00012587
Fructilactobacillus sanfranciscensis	29.0782	8.83787	6.04107	3.70616	0.000125784
Francisella tularensis	30.2663	9.84196	8.88184	3.08654	0.000125686
Ligilactobacillus agilis	30.2663	12.6901	3.49894	3.16487	0.000125661
Campylobacter coli	31.4545	2.50673	6.04107	2.69993	0.000125654
Pantoea sp. At-9b	29.0782	29.2163	33.8807	2.82982	0.00012558
Staphylococcus simiae	29.0782	7.78092	5.30578	3.70616	0.000125571
Latilactobacillus curvatus	29.0782	25.4888	16.1439	3.25623	0.000125565
Laribacter hongkongensis	30.2663	25.9385	12.6877	2.7898	0.000125544
Lactobacillus kefiranofaciens	29.0782	8.92965	4.45448	3.70616	0.000125538
Pengzhenrongella sicca	29.0782	31.9364	5.70358	3.39959	0.000125536
Zhaonella formicivorans	29.0782	72.4198	22.3511	2.54168	0.000125486
Hymenobacter oligotrophus	29.0782	8.65891	4.18814	3.70616	0.000125471
Hymenobacter tibetensis	29.0782	10.371	3.02054	3.70616	0.000125438
Cloacibacillus porcorum	29.0782	66.2397	18.0613	2.70097	0.000125424
Bacillus paranthracis	29.0782	26.0556	16.9403	3.21151	0.000125412
Caldalkalibacillus thermarum	29.0782	30.5225	10.3015	3.28984	0.000125332
Secundilactobacillus malefermentans	29.0782	46.4899	17.7637	2.93316	0.00012532
Kingella kingae	29.0782	36.1068	79.5375	1.71666	0.000125261
Tetragenococcus osmophilus	29.0782	61.5392	23.9427	2.60323	0.000125218
Streptomonospora litoralis	31.4545	6.36162	14.2589	2.41085	0.000125175
Phycicoccus sp. HDW14	29.0782	8.65891	2.25871	3.70616	0.000125162
Streptococcus halotolerans	29.0782	68.3154	60.6698	1.71666	0.000125138
Pontibacter sp. SGAir0037	29.0782	27.6112	14.5245	3.20201	0.000125095
Blautia producta	29.0782	20.9998	11.0753	3.35157	0.000125057
Muricauda sp. SCSIO 64092	29.981	21.7247	32.562	2.47266	0.000125049
Pannonibacter phragmitetus	30.2663	8.74446	1.97735	3.14969	0.00012495
Trueperella pyogenes	29.0782	15.3943	5.5704	3.51643	0.000124893
Haematospirillum jordaniae	29.0782	14.1168	12.0801	3.39023	0.000124885
Actinomyces qiguomingii	29.0782	27.7507	8.91264	3.28984	0.00012486
Pseudomonas protegens	29.0782	15.5438	4.47892	3.52945	0.000124828
Candidatus Aquiluna sp. UB-MaderosW2red	29.0782	5.11847	1.91541	3.70616	0.000124789
Mariniplasma anaerobium	29.0782	72.0557	15.1027	2.60323	0.000124749
Planococcus sp. MB-3u-03	29.0782	20.1561	12.4229	3.28984	0.000124739
Aggregatibacter sp. Marseille-P9115	29.0782	108.104	64.3733	1.09875	0.000124732
Hymenobacter nivis	29.0782	17.3783	6.70091	3.44341	0.000124711
Clostridium baratii	29.0782	15.0922	4.45632	3.51643	0.000124687
Thermoanaerobacterium saccharolyticum	30.2663	18.3926	7.53852	2.87169	0.000124648
Flexistipes sinusarabici	29.0782	8.50968	10.0267	3.46337	0.000124594
Candidatus Deianiraea vastatrix	29.0782	8.8626	6.71838	3.52945	0.000124586
Streptococcus gallolyticus	29.0782	68.5021	56.7946	1.71666	0.000124535
Clostridium sp. JN-1	29.0782	72.3563	38.3083	2.06888	0.000124532
Alkalitalea saponilacus	29.0782	93.7373	40.9521	1.74003	0.000124442
Desulfoscipio gibsoniae	29.0782	49.8563	25.6133	2.60323	0.000124435
Suttonella sp. R2A3	29.0782	9.63245	8.48925	3.45643	0.000124397
Rhodocytophaga rosea	29.0782	29.0047	8.10239	3.22869	0.000124391
Tichowtungia aerotolerans	29.0782	13.5171	16.6842	3.22869	0.000124371
Mycoplasma capricolum	29.0782	25.9727	22.985	2.93316	0.000124311
Streptomyces hygroscopicus	29.0782	20.8456	12.919	3.21151	0.0001243
Bacillus siamensis	29.0782	26.0017	7.79856	3.25623	0.000124276
Providencia stuartii	29.0782	10.5691	9.78923	3.39959	0.000124269
Muricauda lutaonensis	29.0782	120.799	25.6133	1.71666	0.000124248
Aerococcus christensenii	29.0782	9.70632	9.62208	3.40749	0.000124223
Carnobacterium divergens	29.0782	7.77082	9.00266	3.44341	0.000124216
Lysinibacillus sp. GJ-1	30.2663	6.06734	5.5681	3.00464	0.000124209
Rhodoplanes sp. Z2-YC6860	29.0782	7.99082	3.75307	3.54675	0.000124161
Mycoplasma sp. NEAQ87857	29.0782	39.2788	33.3684	2.5249	0.000124145
Romboutsia hominis	29.0782	36.0741	16.1095	2.93316	0.000124119
Sulfuricurvum kujiense	29.0782	5.42776	6.28222	3.51643	0.000124111
Bombilactobacillus bombi	29.0782	44.8422	66.6171	1.71666	0.000123979
Acidaminococcus intestini	29.0782	135.454	41.2209	1.16224	0.000123956
Succinivibrio dextrinosolvens	30.2663	13.7709	9.03485	2.7898	0.000123866
Coriobacterium glomerans	29.0782	24.3666	10.0226	3.17084	0.000123852
Staphylococcus felis	29.0782	28.8712	20.8656	2.88158	0.00012385
Heliorestis convoluta	29.0782	59.4855	17.9157	2.56962	0.00012382
Desulfofarcimen acetoxidans	29.0782	65.4512	28.5179	2.26097	0.000123767
Streptobacillus moniliformis	29.0782	36.8495	53.3885	2.06888	0.000123752
Brevibacterium casei	29.0782	5.18737	3.43863	3.52945	0.00012373
Oscillibacter sp. NSJ-62	29.0782	26.8973	57.9082	2.08751	0.000123718
Erysipelothrix sp. A18Y020d	29.0782	30.3371	16.7112	2.93316	0.000123699
Clostridium fermenticellae	30.2663	9.04008	6.45952	2.87169	0.000123635
Luteitalea pratensis	29.0782	15.8473	5.61902	3.33588	0.000123604
Fusobacterium canifelinum	29.0782	127.028	69.9787	0.593388	0.000123587
Ruminococcus sp. FMBCY1	29.0782	12.3847	9.57707	3.27466	0.000123473
Mannheimia granulomatis	29.0782	12.8392	27.453	2.88158	0.000123462
Actinomyces sp. HMT897	29.0782	16.0506	7.9094	3.26457	0.000123461
Rhodothermus marinus	29.0782	101.256	31.6043	1.71666	0.000123449
Actinobacillus pleuropneumoniae	29.0782	14.9922	84.0374	1.6264	0.000123414
Leucobacter sp. Psy1	29.0782	27.0724	6.12314	3.15289	0.000123339
Clostridium sp. JN-9	29.0782	36.6304	10.4968	2.93316	0.000123271
Hymenobacter sp. BRD67	30.2663	13.9368	1.06116	2.87169	0.000123211
Chryseobacterium sp. POL2	29.0782	51.232	85.7487	1.12017	0.000123197
Streptococcus sp. zg-86	29.0782	75.4702	44.0449	1.71666	0.000123121
Sporosarcina sp. Marseille-Q4063	29.0782	7.90236	9.55041	3.27466	0.000123065
Paucilactobacillus hokkaidonensis	29.0782	4.42345	2.23946	3.46337	0.00012298
Algoriphagus sanaruensis	29.0782	122.489	16.1095	1.71666	0.000122879
Fenollaria sporofastidiosus	29.0782	9.28633	3.9547	3.35157	0.000122864
Sediminispirochaeta smaragdinae	31.4545	11.8407	3.49894	2.26365	0.000122856
Carboxydothermus hydrogenoformans	29.0782	68.4525	21.8009	2.24487	0.000122843
Jonquetella anthropi	29.0782	77.7812	21.9151	2.12848	0.000122838
Candidatus Reidiella endopervernicosa	29.0782	215.143	1.30986	0.897098	0.000122772
Fusobacterium sp. NSJ-57	29.0782	21.5196	15.4739	2.93316	0.000122708
Sporosarcina pasteurii	29.0782	43.3515	17.2387	2.60323	0.00012251
Staphylococcus carnosus	29.0782	5.52849	5.83661	3.30301	0.000122468
endosymbiont 'TC1' of Trimyema compressum	29.0782	53.7661	31.8411	2.15106	0.000122434
Coprococcus comes	29.981	48.0203	20.0534	2.06915	0.000122423
Bacillus aquiflavi	29.0782	19.7055	14.6839	2.93316	0.000122419
Ndongobacter massiliensis	29.0782	61.3332	28.8085	2.11557	0.000122366
Aggregatibacter sp. oral taxon 513	29.0782	62.3794	45.6297	1.73449	0.00012233
Enterococcus gallinarum	29.0782	99.314	25.6133	1.71666	0.000122316
Desulfosporosinus meridiei	29.0782	21.7589	14.9946	2.88158	0.000122271
Devriesea agamarum	29.0782	14.1332	3.22976	3.22829	0.000122271
Campylobacter sp. 19-13652	29.0782	52.6851	82.7019	1.0241	0.000122128
Zymomonas mobilis	29.0782	13.7302	5.64678	3.15927	0.00012211
Phascolarctobacterium faecium	29.0782	79.9156	18.4502	2.06915	0.000122036
Thermoclostridium stercorarium	29.0782	33.0539	10.4704	2.80567	0.000122001
Melissococcus plutonius	29.0782	8.22253	7.73693	3.16591	0.000121999
Streptococcus pasteurianus	29.0782	60.754	66.8172	1.24454	0.000121945
Leuconostoc mesenteroides	29.0782	26.1661	13.121	2.82002	0.000121912
Acetomicrobium mobile	29.0782	46.7817	22.8143	2.35947	0.000121905
Candidatus Paracaedibacter acanthamoebae	29.0782	1.6942	2.01369	3.35157	0.000121871
Leptospira noguchii	29.0782	18.9807	11.1756	2.93316	0.000121792
Coprococcus eutactus	29.0782	48.0301	12.8157	2.54168	0.000121767
Erysipelothrix larvae	29.0782	20.4487	9.57707	2.93316	0.000121669
Hymenobacter sp. 5413J-13	29.0782	11.6438	13.8411	2.94698	0.000121661
Listeria sp. PSOL-1	29.0782	14.801	12.4502	2.93316	0.00012162
Erysipelothrix rhusiopathiae	29.0782	28.092	11.5174	2.79118	0.000121615
Schleiferilactobacillus harbinensis	29.0782	9.31136	7.58372	3.09956	0.000121581
Sporolactobacillus terrae	29.0782	18.6657	8.89808	2.94758	0.000121506
Mycoplasmopsis bovis	29.0782	113.564	51.6762	0.867184	0.000121476
Alistipes dispar	29.0782	76.4276	14.6816	2.11557	0.000121463
Parageobacillus caldoxylosilyticus	29.0782	25.9606	14.6839	2.71298	0.00012135
Levilactobacillus suantsaii	29.0782	20.8671	7.20213	2.93316	0.000121326
Hungatella hathewayi	29.0782	20.5834	47.433	2.06655	0.000121319
Lactobacillus apis	29.0782	12.5484	8.56558	3.00287	0.000121313
Pelolinea submarina	29.0782	27.035	9.00266	2.80567	0.000121225
Weissella jogaejeotgali	29.0782	14.2427	10.0267	2.93316	0.000121182
Acetivibrio thermocellus	29.0782	48.1671	22.6156	2.2256	0.000121007
Clostridioides sp. ES-S-0054-01	29.0782	27.4916	11.6727	2.71298	0.000121006
Floricoccus penangensis	29.0782	30.2651	15.7452	2.58805	0.000120982
Rossellomorea oryzaecorticis	29.0782	114.072	8.59659	1.71666	0.00012092
Streptococcus sp. FDAARGOS_521	29.0782	44.4086	47.433	1.71666	0.00012087
Deinococcus ficus	29.981	6.88824	2.87312	2.72088	0.000120803
Lactobacillus amylolyticus	29.0782	17.0469	2.87312	2.99874	0.000120776
Campylobacter hyointestinalis	29.0782	26.3593	108.506	0.593388	0.0001207
Geobacillus thermoleovorans	29.0782	12.3095	7.60477	2.93316	0.000120621
Mammaliicoccus vitulinus	29.0782	12.0421	10.0226	2.88158	0.000120602
Planktothrix agardhii	29.0782	9.00108	8.61936	2.93316	0.000120486
Syntrophobacter fumaroxidans	29.0782	22.1796	9.88676	2.72932	0.000120364
Caballeronia sp. M1242	29.0782	19.8849	11.1362	2.7263	0.000120335
Enterococcus raffinosus	29.0782	13.9823	4.75298	2.93316	0.000120315
Sphingosinicella microcystinivorans	29.0782	6.58883	3.02054	3.0603	0.000120315
Akkermansia muciniphila	30.2663	17.2536	6.30186	2.32447	0.000120295
Peribacillus asahii	29.0782	74.3608	26.6494	1.71666	0.000120238
Neisseria sp. KEM232	29.0782	71.7528	62.7458	0.966253	0.000120221
Flavobacterium album	29.0782	11.0621	7.34193	2.89835	0.000120209
Pasteurella atlantica	29.0782	49.17	43.5017	1.65319	0.000120199
Candidatus Walczuchella monophlebidarum	29.0782	33.9129	27.453	2.18308	0.000120184
Sedimentibacter sp. zth1	29.0782	37.5537	16.7526	2.35947	0.000120106
Tumebacillus avium	29.0782	68.8947	18.9394	1.91437	0.000119977
Denitrobacterium detoxificans	29.0782	11.6131	3.67096	2.93316	0.000119929
Streptococcus milleri	29.0782	58.2294	33.3684	1.71666	0.000119863
Cardinium endosymbiont of Encarsia pergandiella	29.0782	26.4588	21.4578	2.35947	0.000119861
Caloranaerobacter azorensis	29.0782	42.713	30.6489	1.9622	0.000119851
Actinomyces sp. Chiba101	29.0782	20.1079	14.2394	2.58805	0.000119828
Geobacillus sp. C56-T3	29.0782	17.0156	12.134	2.66496	0.000119783
Weissella hellenica	29.0782	17.471	14.6816	2.60323	0.000119774
Photobacterium profundum	30.2663	5.91029	13.1783	2.24034	0.000119752
Pediococcus claussenii	29.0782	15.2198	7.68734	2.77676	0.000119738
Leptolyngbya sp. BL0902	29.0782	3.50112	0.972769	3.06238	0.000119725
Maribellus comscasis	29.0782	19.4028	14.0476	2.58558	0.000119715
Hymenobacter jejuensis	29.0782	20.5289	6.06698	2.7263	0.000119582
Clostridium butyricum	29.0782	23.3629	13.795	2.5249	0.000119582
Actinobacillus suis	29.0782	10.4261	111.22	0.568847	0.00011952
Candidatus Ishikawaella capsulata	29.0782	20.0046	14.4771	2.54168	0.000119513
Thermacetogenium phaeum	29.0782	19.3391	6.36694	2.72464	0.000119511
Actinomyces marmotae	29.0782	12.1484	5.49096	2.82982	0.000119503
Sebaldella termitidis	29.0782	42.5678	39.7874	1.71666	0.000119481
Cryptobacterium curtum	29.0782	59.7446	5.61902	2.24487	0.000119471
Sulfuriroseicoccus oceanibius	29.0782	45.9815	13.6507	2.22392	0.000119363
Gottfriedia acidiceleris	29.0782	15.6618	15.6762	2.54168	0.000119315
Hydrogenobaculum sp. HO	29.0782	18.668	11.1362	2.60323	0.000119314
Secundilactobacillus paracollinoides	29.0782	5.49551	3.14111	2.93316	0.000119294
Enterococcus wangshanyuanii	29.0782	9.94063	11.238	2.70362	0.000119289
Candidatus Babela massiliensis	29.0782	19.0322	9.45625	2.63082	0.000119283
Alistipes senegalensis	29.0782	45.2293	11.7266	2.26097	0.000119262
Aliivibrio fischeri	29.0782	17.5194	56.3239	1.6264	0.000119207
Enterococcus hirae	29.0782	58.538	28.9541	1.71666	0.000119184
Shigella flexneri	29.0782	4.81685	5.76714	2.86474	0.000119147
Lactococcus protaetiae	29.0782	16.7858	10.3782	2.6164	0.000119121
Paenibacillus psychroresistens	29.0782	115.597	17.1107	1.26808	0.000119097
Priestia aryabhattai	29.0782	10.308	17.8179	2.5249	0.000119052
Fretibacterium fastidiosum	29.0782	176.373	19.6508	0.467207	0.000119037
Aquaspirillum sp. LM1	29.981	5.38809	7.32925	2.3941	0.000118961
Comamonas thiooxydans	29.0782	4.80786	6.45952	2.82043	0.000118928
Heliomicrobium modesticaldum	29.0782	41.3404	16.7526	2.15106	0.000118903
Fusobacterium sp. oral taxon 203	29.0782	136.845	39.5443	0.488259	0.000118822
Streptococcus periodonticum	29.0782	59.6013	25.9752	1.71666	0.000118803
Cyclobacterium marinum	29.0782	120.405	43.4491	0.593388	0.000118747
Caproicibacterium amylolyticum	29.0782	54.9016	19.0119	1.91437	0.00011873
Aerococcus urinaehominis	29.0782	11.347	6.12314	2.72088	0.000118725
Azospirillum sp. B510	29.0782	15.2534	6.77614	2.65459	0.00011869
Sphingosinithalassobacter tenebrarum	29.0782	13.5646	4.27191	2.72693	0.000118673
Scardovia inopinata	29.0782	88.862	14.6585	1.58557	0.000118652
Xanthomonas translucens	29.0782	16.9792	5.70358	2.65169	0.000118652
Neisseria sp. ZJ785	29.0782	34.5221	67.9972	1.0911	0.000118638
Kroppenstedtia eburnea	29.0782	20.7691	9.03485	2.5249	0.000118587
Chitinophaga caeni	29.0782	6.40879	4.24463	2.79543	0.000118533
Natranaerobius thermophilus	29.0782	17.6757	10.3015	2.5249	0.000118511
Paraclostridium bifermentans	29.0782	52.9541	28.6512	1.69571	0.000118478
Serratia plymuthica	30.2663	5.40866	9.03485	2.16329	0.000118474
Paenibacillus tianjinensis	29.0782	30.0454	20.3284	2.15106	0.000118459
Jeotgalicoccus sp. ATCC 8456	29.0782	8.79827	4.94338	2.74072	0.000118454
Desulfotomaculum nigrificans	30.2663	39.959	9.88676	1.71668	0.000118409
Pedobacter endophyticus	30.2663	8.90808	6.01761	2.17341	0.00011838
Niallia circulans	29.0782	23.3046	5.49096	2.54168	0.000118372
Thermanaerosceptrum fracticalcis	29.0782	39.3094	34.4774	1.71666	0.000118339
Phascolarctobacterium succinatutens	30.2663	41.4683	8.56558	1.71668	0.000118333
Acetivibrio saccincola	29.0782	54.5204	24.7155	1.74137	0.000118328
Boudabousia tangfeifanii	29.0782	48.7248	13.089	2.05769	0.000118289
Pontivivens ytuae	30.2663	5.90019	3.38807	2.24658	0.000118231
Candidatus Hepatoplasma crinochetorum	29.0782	68.5237	20.162	1.65319	0.000118205
Clostridium acetobutylicum	29.0782	17.0809	4.45632	2.60323	0.000118103
Psychroflexus sp. ALD_RP9	29.0782	11.8726	31.8074	2.06915	0.000118055
Cohnella sp. LGH	29.0782	18.4901	11.2936	2.43181	0.000118054
Oenococcus sicerae	29.0782	19.1607	27.3014	2.06888	0.000117987
Actinomyces sp. zg-332	29.0782	35.8536	14.0476	2.15106	0.000117976
Parascardovia denticolens	29.0782	53.6732	5.64678	2.11557	0.000117972
Hydrogenibacillus sp. N12	29.0782	12.3363	5.76714	2.60323	0.000117886
Enterobacter roggenkampii	29.0782	3.22199	8.10239	2.65459	0.00011782
Hymenobacter baengnokdamensis	30.2663	9.90893	0	2.21456	0.000117812
Erysipelatoclostridium ramosum	29.0782	30.1394	17.7637	2.11557	0.000117794
Gallibacterium anatis	29.0782	10.467	47.2812	1.71666	0.000117794
Clostridium bornimense	29.0782	22.9354	20.9934	2.12848	0.000117759
Lactobacillus gallinarum	29.0782	15.8718	11.1973	2.42558	0.000117757
Mycoplasmopsis bovirhinis	29.0782	18.0549	4.50133	2.54168	0.000117742
Radiobacillus sp. 80	29.0782	26.5368	20.1027	2.0998	0.000117728
Endozoicomonas sp. SCSIO W0465	29.0782	5.88618	16.9403	2.41723	0.000117716
Erysipelothrix sp. Poltava	29.0782	6.74546	7.66165	2.60323	0.000117686
endosymbiont of Sipalinus gigas	29.0782	20.382	15.5971	2.26097	0.000117647
Sphingomonas sinipercae	29.0782	2.20297	2.09407	2.76963	0.000117619
Allobaculum mucolyticum	29.0782	49.0618	10.3159	2.02008	0.000117597
Proteus vulgaris	29.0782	9.3509	8.37613	2.54168	0.000117579
Mariprofundus aestuarium	29.0782	9.04677	4.50133	2.62892	0.000117578
Pandoraea thiooxydans	29.0782	1.54684	5.12629	2.70545	0.00011757
Vescimonas fastidiosa	29.981	8.15952	8.07196	2.15106	0.000117529
[Clostridium] hylemonae	29.0782	33.5912	15.9206	2.06888	0.000117464
Acinetobacter haemolyticus	29.0782	8.94567	4.18814	2.61765	0.000117435
Pseudomonas cichorii	30.2663	4.61979	2.7008	2.16329	0.000117389
Chloracidobacterium validum	29.0782	59.5452	16.8888	1.71666	0.000117344
Capnocytophaga ochracea	29.0782	69.8402	45.2311	0.978264	0.000117336
Clostridium tyrobutyricum	29.0782	20.0407	8.89808	2.35947	0.000117274
Brevibacillus agri	29.0782	27.2529	12.8528	2.18308	0.000117249
Candidatus Desulforudis audaxviator	29.0782	31.0254	15.5971	2.06655	0.000117164
Amedibacterium intestinale	29.0782	46.9135	7.9094	2.03674	0.000117142
Vibrio taketomensis	29.0782	8.97891	9.00266	2.47266	0.000117135
Solitalea canadensis	29.0782	17.9363	62.1865	1.21149	0.000117109
Flavobacterium oreochromis	29.0782	14.0651	11.1408	2.35947	0.000117096
Weissella soli	29.0782	12.2236	3.67096	2.54168	0.000117084
Thermus caldilimi	29.0782	55.2056	60.9084	0.780321	0.000117062
Biomaibacter acetigenes	29.0782	12.4424	8.37629	2.42558	0.000116997
Alteromonas macleodii	29.0782	15.9157	9.22742	2.35947	0.000116956
Bifidobacterium dentium	29.0782	10.4014	0.957707	2.60323	0.000116942
Alistipes shahii	31.1349	39.1285	15.1027	1.02293	0.000116915
Bacillus sp. Cs-700	29.0782	33.1834	12.2463	2.06888	0.000116839
Candidatus Nanosynbacter lyticus	29.0782	61.4007	19.7735	1.55762	0.000116795
Turicibacter sp. H121	29.0782	20.9884	5.02568	2.35947	0.00011674
Adhaeribacter radiodurans	29.981	12.4941	4.18814	2.06915	0.00011669
Thermovirga lienii	29.0782	70.147	35.486	1.0907	0.000116637
Streptococcus infantarius	29.0782	72.8989	26.6942	1.24454	0.000116617
Desulforamulus reducens	29.0782	35.3138	24.4731	1.74137	0.000116562
Crocinitomix sp. GM2_3_6_6	29.0782	27.8431	12.2365	2.09462	0.000116548
Trueperella bialowiezensis	29.0782	53.098	37.2688	1.24454	0.000116529
Candidatus Hoaglandella endobia	29.0782	18.8639	15.5907	2.11869	0.000116456
Schnuerera ultunensis	29.0782	25.4736	12.8528	2.09462	0.000116434
Anseongella ginsenosidimutans	29.0782	23.1973	21.3595	1.93817	0.000116432
Halothiobacillus neapolitanus	29.0782	9.60654	6.68172	2.40281	0.000116302
Eikenella exigua	29.0782	49.9564	74.9203	0.429891	0.000116237
Capnocytophaga sp. oral taxon 902	29.0782	95.7815	44.3012	0.529901	0.000116199
Bacillus sp. CMF21	29.0782	18.6227	13.8411	2.10991	0.000116089
Geosporobacter ferrireducens	29.0782	23.779	11.7035	2.08751	0.000116045
Clostridium sp. DL-VIII	29.0782	8.35845	5.76714	2.40281	0.000116044
Aquifex aeolicus	29.0782	37.7656	20.9934	1.71666	0.000116042
Neisseria chenwenguii	29.0782	68.1522	61.2491	0.472935	0.000116004
Fructobacillus sp. KI3_B9	29.0782	11.1729	17.1312	2.11557	0.000115988
Chryseobacterium arthrosphaerae	29.0782	26.6988	26.5288	1.71666	0.000115933
Rhodovulum sp. P5	29.0782	2.23288	1.80053	2.54168	0.000115887
Exiguobacterium antarcticum	29.0782	64.4282	13.6701	1.5278	0.000115869
Streptococcus sp. DAT741	29.0782	35.1563	21.2344	1.71666	0.000115846
Avibacterium paragallinarum	29.0782	14.5641	32.6263	1.71666	0.000115818
Rothia sp. ZJ932	29.0782	8.98409	2.91831	2.42558	0.000115813
Ignatzschineria sp. HR5S32	29.0782	18.5794	11.8641	2.10991	0.000115769
Candidatus Pelagibacter sp. RS40	30.2663	9.41873	2.96603	1.88026	0.000115767
Limnochorda pilosa	29.0782	17.5013	6.70395	2.2256	0.000115703
Vagococcus carniphilus	29.0782	35.3589	20.0452	1.71666	0.000115674
Euzebya pacifica	29.0782	17.5158	4.78853	2.26097	0.00011566
Algoriphagus machipongonensis	29.0782	10.6524	8.56558	2.26097	0.000115647
Paenalcaligenes hominis	29.0782	4.55655	15.3045	2.18308	0.000115601
Paenibacillus albus	29.0782	20.7374	6.11827	2.18308	0.000115586
Pararhodospirillum photometricum	29.0782	6.33416	5.30578	2.35947	0.000115467
Alicyclobacillus acidocaldarius	29.0782	16.3119	10.9819	2.10991	0.000115424
Evansella cellulosilytica	29.0782	15.2041	7.79856	2.19196	0.000115423
Lacrimispora saccharolytica	29.0782	13.2703	12.2463	2.1139	0.000115382
Slackia heliotrinireducens	29.0782	13.7144	8.51408	2.18308	0.000115338
Companilactobacillus ginsenosidimutans	29.0782	10.8281	8.0744	2.2256	0.000115323
Weeksella virosa	29.0782	7.48422	7.87261	2.26097	0.000115252
Phascolarctobacterium sp. Marseille-Q4147	29.0782	26.8531	21.8684	1.71499	0.000115189
Paracholeplasma brassicae	29.0782	13.6866	5.61902	2.2256	0.000115187
Athalassotoga saccharophila	29.0782	13.1806	7.66165	2.18308	0.000115153
Brevibacillus laterosporus	29.0782	14.2236	6.28222	2.19196	0.000115092
Pseudarthrobacter sulfonivorans	29.0782	96.3185	61.2979	0	0.000115042
Ammonifex degensii	29.0782	10.9543	12.317	2.08583	0.000114978
Psychromonas ingrahamii	29.0782	31.5848	18.2009	1.69957	0.000114913
Arachidicoccus sp. B3-10	29.0782	13.1444	5.64678	2.18308	0.000114828
Aggregatibacter segnis	29.0782	50.4785	57.9864	0.593388	0.000114785
Spirosoma sp. CJU-R4	29.0782	27.8657	17.1312	1.74209	0.000114723
Lactobacillus sp. 3B(2020)	30.2663	7.88278	3.80239	1.73794	0.000114709
Hydrogenophaga sp. BPS33	29.0782	13.3212	10.3015	2.0641	0.000114707
Cronobacter sakazakii	29.0782	87.555	36.5925	0.593388	0.000114696
Taylorella equigenitalis	29.0782	7.26612	6.06698	2.2256	0.000114681
Actinomyces wuliandei	29.0782	16.2078	6.04107	2.11557	0.000114666
Campylobacter mucosalis	29.0782	15.4134	52.2828	1.12329	0.000114644
Candidatus Izimaplasma sp. HR1	29.0782	7.49609	5.49096	2.2256	0.00011461
Oxynema aestuarii	29.0782	12.5138	2.44731	2.2256	0.000114574
Solitalea sp. S2-8	29.0782	31.3893	15.3045	1.71666	0.000114559
Lutibacter profundi	29.0782	7.26857	5.23518	2.2256	0.000114548
Bacteroides xylanisolvens	29.0782	53.4244	32.2976	1.0755	0.000114511
Variovorax sp. WDL1	29.0782	17.4037	4.45632	2.10991	0.000114478
Acidaminococcus fermentans	29.0782	86.058	13.4602	1.08165	0.000114476
Bacillus paralicheniformis	29.0782	30.4633	14.5565	1.71666	0.000114356
Alistipes sp. dk3624	29.0782	37.5534	10.4968	1.71666	0.000114344
Neisseria zalophi	29.0782	19.0082	72.6696	0.593388	0.000114305
Sporosarcina sp. Marseille-Q4943	29.0782	12.504	7.79534	2.06888	0.000114268
Levilactobacillus koreensis	29.0782	5.3481	3.38807	2.2256	0.00011408
Paucilactobacillus nenjiangensis	29.0782	8.98265	1.04704	2.2256	0.000114032
Actinomyces procaprae	29.0782	30.8136	11.7035	1.71666	0.000113931
Candidatus Hydrogenosomobacter endosymbioticus	29.0782	5.95897	8.37629	2.08751	0.00011391
Planctomyces sp. SH-PL62	29.0782	18.3859	4.55023	2.00567	0.000113809
Enterococcus durans	29.0782	28.3265	12.1746	1.71666	0.000113783
Candidatus Amoebophilus asiaticus	29.0782	11.6101	19.3786	1.76304	0.000113776
Bacillus sp. NSP9.1	29.0782	19.2543	16.9403	1.71666	0.00011373
Pelosinus fermentans	29.0782	45.1486	10.4704	1.53899	0.000113707
Williamsoniiplasma luminosum	29.0782	28.2495	17.1932	1.59675	0.000113691
Acinetobacter sp. TTH0-4	31.4545	0.721648	0.859659	1.20861	0.00011362
Croceimicrobium hydrocarbonivorans	29.0782	18.0223	16.7043	1.71666	0.000113581
Bacillus sp. 7D3	29.0782	43.4439	29.741	1.12592	0.000113577
Bacillus sp. CMF12	29.0782	24.7562	12.8528	1.71666	0.00011357
Syntrophobotulus glycolicus	29.0782	50.0664	25.0306	1.14455	0.000113557
Microlunatus elymi	29.0782	4.54107	2.12231	2.19196	0.000113556
Shewanella vesiculosa	29.0782	7.42566	9.22742	1.99948	0.000113526
Pasteurella canis	29.0782	16.5084	48.9993	1.02761	0.000113509
Campylobacter blaseri	29.0782	18.5091	45.9752	1.06632	0.000113492
Jeotgalibaca porci	29.0782	9.25729	5.23518	2.05769	0.000113483
Staphylococcus sp. 17KM0847	29.0782	7.15234	3.34224	2.11869	0.000113443
Sinimarinibacterium sp. NLF-5-8	29.0782	9.05016	3.02054	2.0998	0.000113422
Eubacterium sp. c-25	29.0782	35.7708	6.55553	1.69571	0.000113398
Rodentibacter heylii	29.0782	24.1129	63.9189	0.593388	0.000113364
Aureibaculum algae	29.0782	54.0928	74.5375	0	0.000113364
Virgibacillus sp. Bac332	29.0782	32.1285	12.4502	1.60473	0.00011334
Berryella intestinalis	29.0782	8.42303	2.7008	2.0998	0.000113315
Actinobacillus porcitonsillarum	29.0782	12.4323	72.8037	0.534341	0.000113298
Citrobacter freundii	29.0782	4.91706	7.42809	2.03632	0.000113286
Candidatus Phytoplasma luffae	29.0782	8.78823	1.70876	2.10991	0.000113264
Eubacterium limosum	29.0782	4.23337	1.04704	2.17684	0.000113244
Bacillus sp. Lzh-5	29.0782	11.5035	9.10047	1.91437	0.000113242
Sphingobium cloacae	29.0782	9.71289	48.5816	1.07794	0.000113204
Hydrogenobacter sp. T-8	29.0782	3.16022	0.950596	2.18308	0.000113178
Deinococcus metallilatus	29.981	11.1731	3.9547	1.61538	0.000113173
Parafannyhessea umbonata	29.0782	31.4084	6.56788	1.71666	0.000113163
Acetohalobium arabaticum	29.0782	19.4663	12.0821	1.74137	0.000113154
Polystyrenella longa	29.981	9.02111	4.89462	1.61629	0.000113137
Helicobacter sp. NHP19-0003	29.0782	6.22635	3.02054	2.08896	0.000113088
Capnocytophaga sp. oral taxon 864	29.0782	51.4916	24.1643	1.08106	0.000113077
Lawsonia intracellularis	29.0782	2.4235	3.38807	2.12487	0.000113071
Salinispira pacifica	29.0782	11.1385	4.0372	2.00309	0.000113057
Clostridium kluyveri	29.0782	14.582	14.0958	1.73669	0.000113003
Massilia violaceinigra	29.0782	3.40758	0.936504	2.15106	0.000112961
Allosaccharopolyspora coralli	29.0782	4.37542	5.15795	2.04586	0.000112945
Bacteroides faecis	29.0782	7.73838	18.4275	1.71666	0.000112932
Plesiomonas shigelloides	29.0782	3.45529	9.22509	1.96316	0.0001129
Neisseria brasiliensis	29.0782	20.5599	41.2039	1.06217	0.000112882
Streptococcus lutetiensis	29.0782	22.9759	9.55041	1.71666	0.000112882
Methylobacterium aquaticum	29.0782	4.35384	1.61488	2.11336	0.000112876
Leptospira kobayashii	29.0782	32.4452	23.6178	1.29092	0.000112831
Mycoplasmopsis californica	29.0782	22.8582	9.21375	1.71666	0.000112817
Robiginitalea biformata	29.0782	21.563	12.2498	1.66207	0.000112782
Metamycoplasma orale	29.0782	11.3839	45.6297	1.06107	0.000112757
Crassaminicella profunda	29.0782	14.199	14.6585	1.69571	0.000112755
Cetobacterium somerae	29.0782	11.0694	13.121	1.76304	0.000112726
Bifidobacterium asteroides	29.0782	33.6485	2.91831	1.69571	0.000112625
Limosilactobacillus panis	29.0782	1.42938	1.15343	2.12487	0.000112624
Ligilactobacillus acidipiscis	29.0782	22.9841	7.79534	1.71666	0.000112602
Neisseria dentiae	29.0782	16.7234	33.615	1.23316	0.000112589
Bartonella ancashensis	29.0782	17.9964	10.4968	1.71666	0.000112585
Rufibacter tibetensis	29.0782	23.0739	7.34193	1.71666	0.000112537
Acinetobacter towneri	29.0782	7.81702	6.71838	1.91437	0.00011253
Deinococcus sp. NW-56	29.981	3.53506	1.80053	1.66699	0.000112524
Psychrobacter sp. WY6	31.4545	2.69384	2.42232	1.0027	0.000112522
Paenibacillus sonchi	29.0782	18.4899	9.68928	1.71666	0.000112501
Staphylococcus sp. AntiMn-1	29.0782	23.5772	6.68448	1.71666	0.000112477
Corynebacterium epidermidicanis	29.0782	2.76067	3.41752	2.02008	0.00011233
Lactobacillus gasseri	29.0782	3.44726	1.09819	2.05794	0.000112301
Clostridium chauvoei	29.0782	22.5958	6.12314	1.71666	0.000112299
Vagococcus fluvialis	29.0782	16.2457	9.62208	1.71666	0.000112288
Paenibacillus larvae	29.0782	15.8711	9.55041	1.71666	0.000112243
Moorella thermoacetica	29.0782	12.3183	2.12231	1.91437	0.000112199
Synechococcus elongatus	29.0782	16.0982	8.89808	1.71666	0.000112159
Desulfitobacterium metallireducens	29.0782	15.7562	8.89808	1.71666	0.000112128
Bacillus shivajii	29.0782	17.6768	7.79534	1.71666	0.000112124
Butyricimonas virosa	29.0782	16.1008	8.61936	1.71666	0.000112115
Mongoliitalea daihaiensis	29.0782	31.2021	20.6318	1.26925	0.000112081
Liquorilactobacillus hordei	29.0782	20.3914	5.5681	1.71666	0.000112012
Halobacteriovorax sp. BALOs_7	29.0782	11.6803	3.18347	1.87101	0.00011199
Bifidobacterium breve	29.0782	11.8732	2.96603	1.86908	0.000111959
Nibricoccus aquaticus	29.0782	14.6923	3.43863	1.82401	0.000111954
Companilactobacillus futsaii	29.0782	13.3973	9.03485	1.71666	0.000111938
Clostridium sp. C1	29.0782	26.3238	5.02568	1.64345	0.000111917
Lactobacillus paragasseri	29.0782	3.51535	0.874734	2.0054	0.000111882
Vagococcus zengguangii	29.0782	15.4601	7.32925	1.71666	0.000111851
Empedobacter falsenii	29.0782	10.0017	6.06698	1.79797	0.00011176
Bifidobacterium angulatum	29.0782	1.15836	0.936504	2.0043	0.000111672
Eubacterium sp. MSJ-33	29.0782	31.2727	13.504	1.36583	0.000111662
Flaviflexus ciconiae	29.0782	15.64	3.34086	1.77443	0.000111656
Apilactobacillus sp. SG5_A10	29.0782	8.68386	9.21375	1.71666	0.000111543
Oceanicoccus sagamiensis	29.0782	11.6964	7.42809	1.71666	0.000111528
Alicyclobacillus mengziensis	29.0782	18.0994	4.75298	1.69571	0.00011152
Labilibaculum antarcticum	29.0782	9.35495	11.0753	1.66133	0.000111491
Thermincola potens	29.0782	15.2442	7.79534	1.65319	0.000111436
Malacoplasma penetrans	29.0782	10.2686	7.60477	1.71666	0.000111428
Actinobacillus indolicus	29.0782	9.63497	87.3258	0	0.000111412
Pontibacter actiniarum	29.0782	9.26922	5.12629	1.77443	0.000111369
Jeotgalibaca sp. MA1X17-3	29.0782	10.894	6.77614	1.71666	0.000111351
Gilliamella apicola	29.0782	7.50447	4.45632	1.79797	0.000111278
Calothrix brevissima	29.0782	12.5138	5.4016	1.71666	0.000111277
Alteracholeplasma palmae	29.0782	12.0011	5.64678	1.71666	0.00011127
Actinomyces gaoshouyii	29.0782	10.9222	4.45632	1.75532	0.000111269
Campylobacter canadensis	29.0782	7.50402	7.79534	1.71666	0.00011121
Miniphocaeibacter halophilus	29.0782	13.9674	12.2549	1.53899	0.000111189
Proteiniphilum saccharofermentans	29.0782	24.7235	20.0534	1.23316	0.000111138
Akkermansia glycaniphila	29.0782	18.7063	6.68172	1.58569	0.000111069
Mesoflavibacter sp. SCSIO 43206	29.0782	11.0826	5.74624	1.69571	0.000111048
Xenorhabdus bovienii	29.0782	7.89156	10.3809	1.63207	0.000111032
Oceanispirochaeta crateris	29.0782	9.55263	5.03423	1.7255	0.000111018
Jeongeupia sp. HS-3	29.0782	3.50902	14.6839	1.58569	0.000110983
Arcanobacterium pinnipediorum	29.0782	10.9144	3.80239	1.71666	0.000110877
Lysinibacillus sp. 2017	29.0782	8.36411	5.02568	1.71666	0.000110844
Corynebacterium marinum	29.0782	0.358427	0	1.92212	0.000110842
Thermochromatium tepidum	29.0782	19.2808	1.90119	1.65087	0.000110838
Gardnerella leopoldii	29.0782	0	0.988676	1.89864	0.000110794
Staphylococcus agnetis	29.0782	7.9836	4.75298	1.71666	0.000110766
Bisgaardia hudsonensis	29.0782	14.4319	31.1814	1.06619	0.000110757
Thermophilibacter immobilis	29.0782	22.0861	5.49096	1.52805	0.000110755
Anaerostipes rhamnosivorans	29.0782	10.1079	5.65208	1.66699	0.000110733
Candidatus Phytoplasma mali	29.0782	7.89662	4.45448	1.71499	0.000110698
Actinotignum schaalii	29.0782	10.4278	6.70395	1.63207	0.000110671
Neisseria animalis	29.0782	36.0422	67.301	0	0.000110583
Sanguibacter keddieii	30.2663	4.98596	2.01369	1.25365	0.000110575
Collinsella sp. zg1085	29.0782	13.7348	3.18347	1.65319	0.000110562
Thermogutta terrifontis	29.0782	21.1773	25.6238	1.0755	0.000110543
Calycomorphotria hydatis	29.0782	15.7201	20.1027	1.24454	0.000110421
Niallia sp. RD1	29.0782	16.2337	6.55553	1.5278	0.000110398
Streptococcus sp. HSISS1	29.0782	84.5244	11.2936	0.593388	0.000110375
Paralysiella testudinis	29.0782	12.2699	54.8668	0.526781	0.000110357
Pseudothermotoga thermarum	29.0782	49.1262	10.0514	1.04616	0.000110347
Candidatus Hamiltonella defensa	29.0782	2.51083	9.00266	1.61538	0.000110204
Flavobacterium sp. xlx-214	29.0782	12.5709	6.28222	1.53899	0.000110107
Paraburkholderia acidisoli	30.2663	1.43462	4.89462	1.15063	0.000109954
Weissella ceti	29.0782	8.79007	5.02568	1.5888	0.000109935
Bacteroides zhangwenhongii	29.0782	13.3855	23.7165	1.12329	0.000109891
Flavobacterium sp. CS20	29.0782	6.12958	8.05476	1.53899	0.000109812
Limosilactobacillus frumenti	29.0782	3.13749	1.11362	1.71666	0.000109748
Chryseobacterium aureum	29.0782	17.1935	15.5907	1.23316	0.000109747
Neobacillus mesonae	29.0782	3.45643	0.854381	1.71666	0.000109735
Malacoplasma iowae	29.0782	17.6059	14.6839	1.24454	0.000109724
Vallitalea guaymasensis	29.0782	69.8998	15.3045	0.593388	0.000109702
Spirosoma taeanense	29.0782	9.42801	5.70358	1.52805	0.000109651
Pontibacillus sp. HMF3514	29.0782	35.5112	7.90549	1.16224	0.000109639
Bacteroides nordii	29.0782	24.0096	11.0753	1.23316	0.000109638
Candidatus Cyclonatronum proteinivorum	29.0782	13.3045	10.0685	1.38448	0.000109635
Campylobacter sp. RM6914	29.0782	14.3712	47.7225	0.551162	0.000109584
Paraoerskovia marina	29.0782	4.65421	3.83083	1.61538	0.000109569
Pasteurella skyensis	29.0782	16.0679	12.6877	1.26808	0.00010944
Providencia rettgeri	29.0782	8.99488	18.0697	1.23316	0.000109407
Aquitalea denitrificans	29.0782	38.8026	8.55537	1.0755	0.000109397
Myxococcus xanthus	29.0782	3.7154	0.859659	1.66699	0.000109391
Faecalibacter bovis	29.0782	13.612	15.3233	1.23316	0.000109382
Candidatus Campylobacter infans	29.0782	7.09718	18.0528	1.24454	0.000109318
Neisseria weixii	29.0782	13.8208	71.828	0	0.000109309
Corynebacterium endometrii	29.0782	2.98323	3.38807	1.59462	0.000109194
Collinsella stercoris	29.0782	9.76311	2.01369	1.53926	0.000109174
Bdellovibrio bacteriovorus	29.0782	9.70632	17.0876	1.21149	0.000109153
Erwinia sp. Ejp617	29.0782	13.0081	9.57707	1.32584	0.000109095
Neisseria animaloris	29.0782	16.3549	48.843	0.429891	0.000109043
Fructilactobacillus fructivorans	29.0782	3.61264	2.01369	1.5888	0.000108988
Desulfobulbus oligotrophicus	29.0782	3.23377	1.80053	1.59702	0.00010898
Allocoleopsis franciscana	30.2663	3.67286	3.03349	1.03024	0.000108966
Actinobacillus delphinicola	29.0782	4.33139	21.0695	1.16224	0.000108942
Neisseria weaveri	29.0782	6.5687	23.386	1.0755	0.000108872
Metabacillus sediminilitoris	29.0782	7.4917	1.80053	1.52805	0.000108853
Treponema sp. Marseille-Q4132	29.0782	29.6291	35.0296	0.534341	0.0001088
Desulfitobacterium dehalogenans	29.0782	29.8804	8.90896	1.0911	0.000108767
Ruminiclostridium cellulolyticum	29.0782	15.1707	16.8075	1.08671	0.000108675
Flaviflexus salsibiostraticola	29.0782	4.53015	1.70876	1.53899	0.000108653
Streptomyces clavuligerus	29.0782	17.2692	7.68734	1.24454	0.000108574
Cohnella abietis	29.0782	14.5838	9.10047	1.24454	0.000108558
Allobaculum sp. Allo2	29.0782	14.6928	4.37367	1.34112	0.000108527
Pontibacter pudoricolor	29.0782	20.4748	11.2936	1.10319	0.000108392
Oleidesulfovibrio alaskensis	29.0782	24.713	14.5245	0.979823	0.000108377
Mycoplasma gallisepticum	29.0782	9.22973	14.5565	1.15419	0.000108281
Helicobacter cinaedi	29.0782	5.15147	13.4018	1.21149	0.000108154
Aliarcobacter cryaerophilus	29.0782	19.1682	7.60477	1.16224	0.000108122
Gracilinema caldarium	29.0782	8.4295	19.6508	1.03049	0.000108108
Lactococcus garvieae	29.0782	22.5449	9.90293	1.06632	0.000108083
Burkholderia mayonis	29.0782	34.525	6.55553	0.967254	0.000107891
Streptococcus sp. NSJ-72	29.0782	21.5157	7.26696	1.10728	0.000107872
Pseudopedobacter saltans	29.0782	19.7387	7.50615	1.12329	0.000107869
Mucilaginibacter xinganensis	29.0782	5.6234	13.4079	1.16224	0.000107832
Desulfohalobium retbaense	29.0782	25.9786	1.67523	1.16224	0.000107785
Paenibacillus chitinolyticus	29.0782	19.5175	1.90119	1.23316	0.000107766
Psychrosphaera aestuarii	29.0782	12.527	62.8732	0	0.00010776
Empedobacter brevis	29.0782	4.90906	6.01761	1.31446	0.000107713
Frederiksenia canicola	29.0782	4.98596	14.4043	1.12592	0.000107666
Blautia sp. NBRC 113351	29.0782	8.08962	12.1746	1.12329	0.000107568
Thiolapillus brandeum	29.0782	10.902	3.75307	1.26925	0.000107555
Kaistella sp. 97-N-M2	29.0782	12.197	5.65208	1.21149	0.000107547
Vibrio europaeus	29.0782	4.11127	8.89808	1.23316	0.0001075
Waddlia chondrophila	29.0782	24.9189	4.02738	1.08106	0.000107465
Paenibacillus naphthalenovorans	29.0782	13.0499	2.85179	1.24454	0.000107421
Pseudomonas sp. SGAir0191	29.0782	3.83435	5.70358	1.29279	0.000107406
Alkaliphilus oremlandii	29.0782	15.4581	10.3159	1.03328	0.000107267
Lachnoclostridium sp. YL32	29.0782	9.5833	5.30578	1.21149	0.000107257
Thermanaeromonas toyohensis	29.0782	10.2903	2.09407	1.26808	0.000107226
Ligilactobacillus murinus	29.0782	11.9096	5.5681	1.16224	0.000107143
Thiomicrorhabdus indica	29.0782	13.1504	5.65208	1.14455	0.000107137
Candidatus Phytoplasma ziziphi	29.0782	13.6754	6.12314	1.12773	0.000107135
Gimesia aquarii	29.0782	33.3478	46.7913	0	0.000107059
Halanaerobium praevalens	29.0782	9.93789	6.92073	1.14455	0.000107051
Carnobacterium inhibens	29.0782	8.45057	4.61371	1.21149	0.000107044
Lactococcus allomyrinae	29.0782	1.87525	2.22816	1.34112	0.000107031
Actinomyces lilanjuaniae	29.0782	12.2018	7.9094	1.08954	0.000107006
Thermoanaerobacterium sp. RBIITD	29.0782	4.88571	3.18347	1.26808	0.000106914
Vagococcus lutrae	29.0782	15.927	3.35045	1.12329	0.000106861
Candidatus Desulfofervidus auxilii	29.0782	16.5599	7.83811	1.01837	0.000106859
Geoalkalibacter subterraneus	29.0782	8.95889	7.9094	1.10728	0.000106846
Butyricimonas faecalis	29.0782	12.8083	6.68448	1.08106	0.000106801
Mycoplasma anserisalpingitidis	29.0782	10.4354	5.64678	1.12773	0.000106768
Mycobacterium diernhoferi	29.0782	6.82572	2.51284	1.23316	0.000106722
Bifidobacterium pseudocatenulatum	29.0782	13.4996	2.19638	1.15419	0.000106687
Parolsenella massiliensis	29.0782	12.7085	6.68448	1.06619	0.000106682
Paenibacillus alvei	29.0782	16.4708	3.14111	1.08671	0.000106606
Oceanihabitans sp. IOP_32	29.0782	3.60702	7.32925	1.14455	0.000106547
Kushneria phosphatilytica	29.0782	7.44287	8.88184	1.06424	0.000106546
Capnocytophaga sp. oral taxon 323	29.0782	56.9603	30.1267	0	0.000106516
Paenibacillus sp. YPG26	29.0782	6.99264	1.90119	1.21149	0.000106479
Paenibacillus antarcticus	29.0782	10.4953	3.02054	1.14455	0.000106477
Kosakonia cowanii	29.0782	4.00941	9.78923	1.0755	0.000106466
Persicimonas caeni	29.0782	2.31673	1.51674	1.26808	0.000106416
Streptococcus ruminantium	29.0782	14.3491	5.86329	1.02328	0.000106381
Ligilactobacillus saerimneri	29.0782	7.59872	3.9547	1.14455	0.000106366
Melaminivora jejuensis	29.0782	1.00973	3.38807	1.23316	0.00010634
Thermaerobacter marianensis	29.0782	6.74652	1.09819	1.21149	0.000106329
Desulfosporosinus acidiphilus	29.0782	4.79874	4.24463	1.16224	0.000106292
Moorella sp. Hama-1	29.0782	7.88114	2.80951	1.15419	0.00010628
Spirochaeta africana	29.0782	13.3714	3.60106	1.06424	0.000106234
Vibrio owensii	29.0782	4.26848	5.5704	1.12773	0.000106201
Thermanaerovibrio acidaminovorans	29.0782	84.2608	12.7339	0	0.000106187
Ligilactobacillus animalis	29.0782	9.67249	6.77614	1.03049	0.00010616
Fusobacterium gonidiaformans	29.0782	11.3719	6.92073	1.0027	0.00010613
Desulfitobacterium dichloroeliminans	29.0782	13.1355	1.87654	1.08671	0.000106103
Vibrio sp. SCSIO 43136	29.0782	7.15522	3.14111	1.12329	0.000106039
Spirosoma aerolatum	29.0782	4.03865	2.96603	1.16224	0.000106019
Cellulophaga lytica	29.0782	6.05858	3.03349	1.13012	0.000105974
Gordonibacter urolithinfaciens	29.0782	9.62325	3.35919	1.0751	0.000105939
Clostridium gasigenes	29.0782	5.86917	7.32925	1.0336	0.000105929
Croceibacter atlanticus	29.0782	7.25597	4.50133	1.0755	0.000105912
Mycolicibacterium phocaicum	29.0782	9.1095	3.67096	1.06619	0.000105877
Acetobacter pasteurianus	29.0782	9.93789	5.93205	1.00547	0.000105863
Lactobacillus taiwanensis	29.0782	3.4932	2.87312	1.1478	0.000105848
Adlercreutzia equolifaciens	29.0782	3.25579	1.71932	1.16224	0.000105749
Corynebacterium deserti	29.0782	2.25222	1.61488	1.16224	0.000105642
Acetobacterium wieringae	29.0782	10.8627	3.14111	1.02396	0.000105637
Tepiditoga spiralis	29.0782	4.25938	2.85179	1.10886	0.000105625
Limosilactobacillus gastricus	29.0782	3.39761	0.950596	1.15419	0.000105579
Fructilactobacillus lindneri	29.0782	5.51721	3.35919	1.06687	0.000105509
Candidatus Planktophila vernalis	29.0782	2.15377	1.12936	1.15419	0.000105496
Fusobacterium varium	29.0782	26.0979	13.6115	0.593388	0.000105493
Liquorilactobacillus nagelii	29.0782	2.76067	0.854381	1.14455	0.000105435
Candidatus Fukatsuia symbiotica	29.0782	2.07174	1.11408	1.14455	0.000105415
Acetobacterium woodii	29.0782	3.6611	0.972769	1.12773	0.000105411
Candidatus Enterovibrio luxaltus	29.0782	7.41328	3.38807	1.02293	0.000105358
Flavobacterium fluviale	29.0782	2.7489	2.96603	1.08106	0.000105302
Neisseria dumasiana	29.0782	16.1247	17.8179	0.593388	0.000105269
Marinomonas algicola	29.0782	0.432904	0.837613	1.14455	0.000105223
Candidatus Arsenophonus lipoptenae	29.0782	2.16084	3.43863	1.06424	0.0001052
Altererythrobacter sp. B11	29.0782	3.89164	0	1.11149	0.000105156
Bifidobacterium subtile	29.0782	10.2921	2.22724	0.984408	0.000105146
Komagataeibacter xylinus	29.0782	8.07362	5.49096	0.940142	0.000105141
Virgibacillus halodenitrificans	29.0782	3.26538	1.11408	1.0911	0.000105126
Winogradskyella forsetii	29.0782	3.09945	2.22816	1.06632	0.000105106
Oceanidesulfovibrio marinus	29.0782	2.21504	0.900266	1.08758	0.000104972
Empedobacter stercoris	29.0782	8.56169	2.7008	0.968949	0.000104952
Olivibacter sp. LS-1	29.0782	4.38616	1.11408	1.04067	0.000104854
Kerstersia gyiorum	29.0782	0.93283	1.80053	1.06721	0.00010485
Pseudomonas syringae group genomosp. 7	29.0782	1.84316	0	1.09285	0.000104833
Cohnella cholangitidis	29.0782	18.2516	4.89462	0.780321	0.000104777
Roseivivax sp. THAF30	29.0782	3.24489	2.42232	0.984408	0.000104544
Parachlamydia acanthamoebae	29.0782	2.09011	0	1.04906	0.000104531
Pseudomonas sp. gcc21	30.2663	2.74084	1.06116	0.467207	0.000104396
Neisseria musculi	29.0782	11.0755	42.335	0	0.000104343
Wolinella succinogenes	29.0782	0	0.859659	1.02868	0.00010433
Thiospirochaeta perfilievii	29.0782	6.37976	11.238	0.721273	0.000104287
Eubacterium sp. NSJ-61	29.0782	24.0665	7.20213	0.593388	0.000104285
Erysipelothrix sp. HDW6A	29.0782	13.8476	12.919	0.593388	0.000104281
Chlamydiifrater phoenicopteri	29.0782	54.5328	17.1312	0	0.000104218
Limosilactobacillus pontis	29.0782	2.82224	0.957707	0.962425	0.000104109
Lentzea sp. HUAS12	29.0782	2.01946	1.11362	0.964232	0.000104075
Beggiatoa leptomitoformis	29.0782	15.1079	1.97735	0.780321	0.000104028
Caldicellulosiruptor kronotskyensis	29.0782	6.52839	9.00266	0.713713	0.000103887
Lutibacter sp. A64	29.0782	4.36606	1.12936	0.9064	0.00010386
Deinococcus sp. QL22	29.0782	0	0	0.978264	0.000103819
Otariodibacter oris	29.0782	7.49649	18.0053	0.497708	0.000103815
Nitratifractor salsuginis	29.0782	4.84398	6.36694	0.780321	0.000103807
Planococcus donghaensis	29.0782	1.41979	2.42232	0.897098	0.000103733
Marinithermus hydrothermalis	29.0782	16.3804	13.3084	0.467207	0.000103636
Desulfovibrio piger	29.0782	1.82027	1.04704	0.897098	0.000103549
Bifidobacterium actinocoloniiforme	29.0782	17.8769	1.80053	0.684641	0.00010354
Pseudoalteromonas rubra	29.0782	13.2353	8.07399	0.593388	0.00010345
Treponema primitia	29.0782	13.59	34.6028	0	0.000103332
Seonamhaeicola sp. ML3	29.0782	9.84196	9.22742	0.593388	0.00010333
Neisseria shayeganii	29.0782	35.5303	21.9151	0	0.000103275
Campylobacter fetus	29.0782	9.75633	10.6172	0.551162	0.000103232
Treponema sp. OMZ 803	29.0782	42.3859	17.5899	0	0.000103199
Vallitalea pronyensis	29.0782	5.73597	10.6172	0.593388	0.000103183
Sinomicrobium kalidii	29.0782	9.67168	8.07399	0.593388	0.00010313
Bacteroides caecimuris	29.0782	8.58498	8.56558	0.593388	0.000103111
Mesomycoplasma hyopneumoniae	29.0782	35.3836	20.7617	0	0.000103077
Kordia antarctica	29.0782	5.38809	12.4229	0.526781	0.000102947
Flavobacterium pallidum	29.0782	11.9141	5.64678	0.593388	0.000102943
Vespertiliibacter pulmonis	29.0782	6.47105	15.1674	0.429891	0.000102766
Bifidobacterium scardovii	29.0782	18.4596	4.18814	0.496149	0.000102578
Vitreoscilla massiliensis	29.0782	7.42494	8.48925	0.532534	0.000102544
Vibrio natriegens	29.0782	7.05561	5.76714	0.593388	0.000102526
Lentilactobacillus kefiri	29.0782	8.36456	4.75298	0.593388	0.000102481
Enterococcus casseliflavus	29.0782	5.46484	4.78853	0.593388	0.000102226
Prevotella sp. E2-25	29.0782	7.13095	3.80239	0.593388	0.000102218
Arcobacter sp. FWKO B	29.0782	1.08042	1.06116	0.719467	0.000102169
Treponema sp. OMZ 305	29.0782	26.3662	20.1369	0	0.000102166
Vibrio fluvialis	29.0782	14.306	0.874734	0.560799	0.000102153
Entomoplasma melaleucae	29.0782	7.14611	4.55023	0.551162	0.000102026
Breznakiella homolactica	29.0782	20.4822	21.7779	0	0.0001019
Thermoanaerobacter wiegelii	29.0782	7.38997	1.15343	0.593388	0.000101817
Flavobacterium sp. 140616W15	29.0782	5.00372	3.22976	0.568847	0.000101753
Marinobacterium sediminicola	29.0782	2.60786	7.42809	0.493318	0.00010165
Rickettsia australis	29.0782	34.8562	12.0352	0	0.000101633
Elizabethkingia sp. 2-6	29.0782	1.1259	3.9547	0.578955	0.000101595
Gilvibacter sp. SZ-19	29.0782	11.891	2.51284	0.4728	0.000101547
Metamycoplasma hyosynoviae	29.0782	4.85949	28.27	0	0.000101534
Mycoplasma miroungirhinis	29.0782	2.57596	4.55023	0.534341	0.000101491
Fulvivirga lutea	29.0782	6.27495	4.02738	0.496149	0.000101457
Rodentibacter haemolyticus	29.0782	8.11281	25.4678	0	0.000101378
Candidatus Rhabdochlamydia oedothoracis	29.0782	7.17592	25.7847	0	0.000101344
Desulfovibrio vulgaris	29.0782	2.06701	1.74947	0.578955	0.000101327
Lactobacillus sp. wkB8	29.0782	31.7603	11.7035	0	0.000101302
Anaerobacillus isosaccharinicus	29.0782	3.59466	1.71932	0.551162	0.000101254
Draconibacterium orientale	29.0782	1.68466	2.25871	0.529901	0.000101011
Campylobacter hepaticus	29.0782	1.7435	1.71932	0.534341	0.000100963
Deinococcus puniceus	29.0782	1.63928	0	0.568847	0.000100934
Uruburuella testudinis	29.0782	5.14747	4.24463	0.429891	0.000100899
Treponema sp. OMZ 857	29.0782	21.0688	14.9841	0	0.000100866
Faecalibacterium sp. I2392	29.0782	13.5781	18.3548	0	0.000100731
Zophobihabitans entericus	29.0782	1.88021	2.19638	0.488259	0.00010071
Bathymodiolus septemdierum thioautotrophic gill symbiont	29.0782	21.9082	12.5644	0	0.000100554
Avibacterium volantium	29.0782	5.7438	21.6064	0	0.000100547
Salicibibacter halophilus	30.2663	0	0	0	0.00010052
Neisseria canis	29.0782	8.36526	19.7735	0	0.00010049
Borrelia sp. BU AG58	29.0782	6.50906	20.0534	0	0.000100367
Moraxella catarrhalis	29.981	1.79036	3.9547	0	0.000100366
Amycolatopsis mediterranei	29.0782	33.4822	3.9547	0	0.000100217
Campylobacter corcagiensis	29.0782	18.7979	12.0821	0	0.000100197
Muricauda aurantiaca	29.0782	5.76478	18.8466	0	0.000100107
Aeromonas schubertii	29.0782	15.4371	13.4079	0	0.000100107
Vibrio cyclitrophicus	29.0782	0	0	0.472935	0.000100076
Oenococcus oeni	29.0782	1.31352	0.837613	0.429891	0.00010001
Acaryochloris sp. 'Moss Beach'	29.0782	30.6332	4.24463	0	0.000100007
Treponema sp. OMZ 906	29.0782	19.2338	10.6116	0	0.000100001
Mannheimia ovis	29.0782	7.56174	16.8571	0	9.99507e-05
Prosthecochloris aestuarii	29.0782	31.4865	1.96479	0	9.97191e-05
Shewanella inventionis	29.0782	23.8876	5.76714	0	9.96442e-05
Erysipelothrix sp. HDW6C	29.0782	20.1147	7.53852	0	9.95884e-05
Moraxella nonliquefaciens	29.981	0	0	0	9.9572e-05
Echinicola soli	29.0782	7.56174	13.795	0	9.94608e-05
Fusobacterium ulcerans	29.0782	16.1592	8.07196	0	9.93181e-05
Avibacterium sp. 20-132	29.0782	7.82569	12.3578	0	9.92545e-05
Neisseria wadsworthii	29.0782	8.1703	11.5174	0	9.9151e-05
Mycoplasma phocoenae	29.0782	4.6495	13.1358	0	9.90934e-05
Synechococcus sp. HK01-R	29.0782	23.636	2.19638	0	9.90503e-05
Alysiella filiformis	29.0782	6.69551	11.1408	0	9.89582e-05
Campylobacter pinnipediorum	29.0782	3.38674	4.24463	0.186933	9.89417e-05
Paraburkholderia hospita	29.0782	4.39563	12.1975	0	9.89205e-05
Treponema putidum	29.0782	5.84016	11.0753	0	9.88708e-05
Campylobacter iguaniorum	29.0782	3.36817	12.2463	0	9.88359e-05
Nonlabens spongiae	29.0782	12.8546	6.55553	0	9.87783e-05
Neisseria sp. Dent CA1/247	29.0782	3.09077	11.8641	0	9.87498e-05
Pontibacter russatus	29.0782	14.2164	4.89462	0	9.8635e-05
Kangiella sediminilitoris	29.0782	7.80307	7.87261	0	9.85348e-05
Glaesserella sp. 15-184	29.0782	5.20725	9.00266	0	9.84823e-05
Moorella glycerini	29.0782	16.4358	2.6242	0	9.84713e-05
Metamycoplasma arthritidis	29.0782	1.13914	11.1973	0	9.84676e-05
Campylobacter avium	29.0782	4.60705	8.59659	0	9.83633e-05
Mannheimia bovis	29.0782	7.79891	6.65418	0	9.83395e-05
Uruburuella suis	29.0782	5.96352	7.66165	0	9.83357e-05
Neisseria zoodegmatis	29.0782	4.2123	8.61936	0	9.83315e-05
Alicyclobacillus acidoterrestris	29.0782	7.81088	6.45952	0	9.83094e-05
Bacteroides luhongzhouii	29.0782	9.98858	4.94338	0	9.82627e-05
Paraburkholderia xenovorans	29.0782	1.1289	1.12936	0.186933	9.82403e-05
Gramella forsetii	29.0782	8.70768	4.37367	0	9.80563e-05
Serratia symbiotica	29.0782	14.327	1.11973	0	9.8041e-05
Actinobacillus equuli	29.0782	1.58793	8.10239	0	9.80128e-05
Halomonas sp. KO116	29.0782	8.42121	4.18814	0	9.80009e-05
Capnocytophaga sp. H2931	29.0782	3.42708	6.28222	0	9.78869e-05
Xenorhabdus budapestensis	29.0782	5.6234	4.94338	0	9.78702e-05
Treponema sp. OMZ 838	29.0782	4.80786	5.02568	0	9.781e-05
Paludibacterium sp. B53371	29.0782	3.01958	5.5681	0	9.7736e-05
Borrelia miyamotoi	29.0782	4.59604	4.45632	0	9.76999e-05
Chryseobacterium sp. SC2-2	29.0782	4.02907	4.75298	0	9.76963e-05
Pasteurella dagmatis	29.0782	4.91629	4.18814	0	9.76857e-05
Legionella endosymbiont of Polyplax serrata	29.0782	3.5866	4.89462	0	9.76792e-05
Rhizobium bangladeshense	29.0782	7.05732	2.80951	0	9.76577e-05
Endomicrobium proavitum	29.0782	4.23105	4.37367	0	9.76538e-05
Leclercia adecarboxylata	29.0782	4.11707	4.37367	0	9.76436e-05
Mycoplasma sp. E35C	29.0782	8.82105	0.859659	0	9.75043e-05
Mycoplasmopsis arginini	29.0782	1.42504	4.86385	0	9.74799e-05
Geobacter sp. FeAm09	29.0782	1.80636	4.47892	0	9.74526e-05
Vitreoscilla stercoraria	29.0782	1.1614	4.78853	0	9.74442e-05
Campylobacter helveticus	29.0782	3.72665	3.34224	0	9.74434e-05
Bacteroides sp. M10	29.0782	3.45529	3.38807	0	9.74264e-05
Thermus aquaticus	29.0782	5.56242	2.12231	0	9.74133e-05
Desulfosporosinus orientis	29.0782	3.5103	3.14111	0	9.73918e-05
Sulfurospirillum cavolei	29.0782	2.69669	3.34086	0	9.73506e-05
Draconibacterium halophilum	29.0782	6.54792	1.00685	0	9.73234e-05
Capnocytophaga sp. H4358	29.0782	3.12818	2.91831	0	9.73218e-05
Aquimarina sp. TRL1	29.0782	1.46923	3.75307	0	9.73062e-05
Leadbettera azotonutricia	29.0782	2.74084	3.03349	0	9.73054e-05
Desulfovibrio desulfuricans	29.0782	4.33139	1.80053	0	9.72511e-05
Acidihalobacter ferrooxydans	29.0782	2.47938	2.81481	0	9.72469e-05
Flagellimonas sp. CMM7	29.0782	3.50902	2.19638	0	9.72405e-05
Thiothrix litoralis	29.0782	3.40602	2.22816	0	9.72363e-05
Alteromonas sp. RKMC-009	29.0782	2.70433	2.61972	0	9.72359e-05
Roseibacterium elongatum	29.0782	5.44418	1.00685	0	9.72242e-05
Geobacter sp. DSM 9736	29.0782	3.41562	2.01369	0	9.72029e-05
Blattabacterium sp. (Blatta orientalis)	29.0782	3.61142	1.87654	0	9.71986e-05
Candidatus Dehalogenimonas etheniformans	29.0782	6.80294	0	0	9.71853e-05
Brevibacillus parabrevis	29.0782	4.70735	1.12936	0	9.71775e-05
Candidatus Profftia tarda	29.0782	2.54583	1.96479	0	9.71169e-05
Constantimarinum furrinae	29.0782	3.99229	1.12936	0	9.71132e-05
Bacteroides humanifaecis	29.0782	4.87309	0	0	9.70117e-05
Jejubacter calystegiae	29.0782	2.71508	0.900266	0	9.69618e-05
Bacteroides sp. PHL 2737	29.0782	2.70459	0.859659	0	9.69543e-05
Leptospirillum ferrooxidans	29.0782	2.19338	0.957707	0	9.6924e-05
Lentilactobacillus laojiaonis	29.0782	1.28858	0.988676	0	9.68476e-05
Capnocytophaga cynodegmi	29.0782	1.12272	0.950596	0	9.68266e-05
Pseudoalteromonas aliena	29.0782	1.074	0.854381	0	9.68068e-05
Aquimarina sp. AD10	29.0782	0.914929	0.80744	0	9.6785e-05
Thalassotalea sp. HSM 43	29.0782	0.363221	0.957707	0	9.67595e-05
Blochmannia endosymbiont of Camponotus nipponensis	29.0782	2.02121	0	0	9.67553e-05
Chryseobacterium sp. 3008163	29.0782	0	1.11362	0	9.67518e-05
Mycoplasma sp. Pen4	29.0782	1.1325	0	0	9.66754e-05
Xylella taiwanensis	29.0782	1.1259	0	0	9.66748e-05
Helicobacter apodemus	29.0782	0.791331	0	0	9.66447e-05
Clostridioides sp. ES-W-0016-02	29.0782	0.551709	0	0	9.66232e-05
Paenibacillus sabinae	29.0782	0.432904	0	0	9.66125e-05
Methylophaga pinxianii	29.0782	0.358427	0	0	9.66058e-05
Moraxella sp. FZLJ2107	29.0782	0	0	0	9.65736e-05
Helicobacter winghamensis	29.0782	0	0	0	9.65736e-05
Gramella sp. MAR_2010_147	29.0782	0	0	0	9.65736e-05
Bacteroides sp. CACC 737	29.0782	0	0	0	9.65736e-05
Bacteroides sp. ZJ-18	29.0782	0	0	0	9.65736e-05
Lactobacillus sp. JM1	29.0782	0	0	0	9.65736e-05
Sum	75274.6	2.78037e+06	1.56246e+06	33755

## Sheet: graph
Species	Control	Asymtomatic	Mild	Severe	Coefficient
Other	55402	534366	342631	11389	0.37122
Veillonella sp. S12025-13	29.0782	15982.7	6969.39	3.70616	0.00267625
Prevotella herbatica	29.0782	15215.2	9297.99	4.50665	0.00298576
Streptococcus sp. oral taxon 431	29.0782	11542.6	11886.7	5.02277	0.00307356
Staphylococcus aureus	109.525	1376.37	989.316	329.569	0.00308669
Streptococcus salivarius	31.1349	24398.7	5695.08	8.91397	0.00327449
Veillonella nakazawae	29.0782	17581.8	10094.7	2.94758	0.00331448
Fusobacterium nucleatum	29.981	26504	4830.65	8.7789	0.00332065
Leptotrichia sp. oral taxon 212	29.0782	11074.4	14093.7	4.53737	0.00338099
Porphyromonas endodontalis	29.0782	12611.6	13727	4.93288	0.00346346
Schaalia meyeri	30.0547	22539.3	9216.32	6.10639	0.00364634
Lachnoanaerobaculum umeaense	29.0782	5964.64	18621.9	7.55473	0.00366843
Veillonella rodentium	29.0782	16168.9	13147.7	5.04178	0.00369145
Streptococcus oralis	29.0782	20574.5	10596.8	42.2823	0.00395523
Prevotella nigrescens	30.2663	29797.2	7496.4	9.85605	0.00405222
Neisseria mucosa	29.0782	6241.56	20851.2	8.88026	0.00405983
Clostridium tetani	359.137	1341.47	2060.57	346.786	0.00421148
Streptococcus pneumoniae	32.2771	15436.8	15846.9	34.2481	0.00428444
Veillonella dispar	29.0782	18866.7	16026.1	3.8871	0.00438602
Bulleidia sp. zg-1006	29.0782	28620.6	10992	3.78747	0.00445685
Prevotella sp. oral taxon 475	29.0782	24185.8	16247.3	7.12712	0.00492369
Prevotella sp. oral taxon 299	31.4545	25765.9	16064	8.25844	0.0050527
Gemella sanguinis	29.981	31939.5	14676	5.35628	0.00535934
Actinomyces pacaensis	29.0782	28841.7	17761.9	3.99235	0.00556144
Prevotella histicola	29.0782	51847.4	9159.96	6.16139	0.00626975
Streptococcus sp. LPB0220	29.0782	36387.3	18770	6.1756	0.00641739
Prevotella oris	29.0782	42880.7	20197.5	7.61466	0.00724031
Campylobacter concisus	29.981	9618.69	41508.6	4.02454	0.00763579
Prevotella intermedia	29.981	47835.6	22025.9	4.92984	0.0079615
Streptococcus parasanguinis	29.981	42180.8	25957.4	5.90561	0.00808932
Porphyrobacter sp. GA68	39.294	34351.5	22204.3	207.605	0.00830961
Rothia mucilaginosa	91.7336	24695.7	29087.6	166.807	0.00841475
Klebsiella pneumoniae	782.236	1099.84	1409.31	794.65	0.00880775
Haemophilus parainfluenzae	32.673	17138.9	44174.5	24.7227	0.00890077
Streptococcus mitis	31.1349	40545	32163.6	47.8109	0.00924945
Lancefieldella parvula	30.2663	69630.6	19596.1	6.84539	0.00954758
Prevotella jejuni	29.9621	59163.2	26466	6.88613	0.0097049
Moraxella osloensis	1255.11	224.363	612.765	797.058	0.0101899
Megasphaera stantonii	29.981	93805.7	14700.4	3.86954	0.010915
Granulicatella adiacens	40.9598	48950	45530.4	19.0497	0.0119636
Pseudoprevotella muciniphila	29.0782	52016.3	49834.6	7.75041	0.0128048
Pasteurella multocida	795.262	2961.22	6132.2	1462.89	0.0147233
Veillonella parvula	31.4545	76491.2	51698.7	22.1903	0.0154186
Porphyromonas sp. oral taxon 275	30.4671	36018.3	82505.4	10.1987	0.0166165
Schaalia odontolytica	40.451	94812.5	48222	35.2173	0.016636
Halomonas sp. JS92-SW72	1570.29	4894.52	7375.46	1778.4	0.0200068
Mycobacterium canettii	6188.8	1.88055	1.11362	1.32584	0.0205642
Gemella haemolysans	48.6323	89438.2	86254.2	46.8597	0.0223515
Cutibacterium acnes	357.412	1650.31	3367.74	2785.28	0.0225029
Prevotella melaninogenica	29.0782	125852	93428.6	25.7241	0.0265521
Veillonella atypica	30.0547	707086	115772	11.4842	0.0822871
Stenotrophomonas maltophilia	7090.24	21857.3	34484.1	13202.6	0.128813
Sum	75274.6	2.78037e+06	1.56246e+06	33755
